# 1 **Hair Follicle Epidermal Stem Cells Define a Niche for Tactile Sensation**

2

3 Chun-Chun Cheng<sup>1,9,11</sup>, Ko Tsutsui<sup>1,11</sup>, Toru Taguchi<sup>2,10,11</sup>, Noriko Sanzen<sup>1</sup>, Asako  
4 Nakagawa<sup>1</sup>, Kisa Kakiguchi<sup>3</sup>, Shigenobu Yonemura<sup>3,4</sup>, Chiharu Tanegashima<sup>5</sup>, Sean D.  
5 Keeley<sup>5</sup>, Hiroshi Kiyonari<sup>6</sup>, Yasuhide Furuta<sup>6</sup>, Yasuko Tomono<sup>7</sup>, Fiona M. Watt<sup>8</sup> and  
6 Hironobu Fujiwara<sup>1,\*</sup>

7

8 <sup>1</sup>Laboratory for Tissue Microenvironment, RIKEN Center for Biosystems Dynamics  
9 Research (BDR), Kobe 650-0047, Japan

10 <sup>2</sup>Department of Neuroscience II, Research Institute of Environmental Medicine, Nagoya  
11 University, Nagoya 464-8601, Japan

12 <sup>3</sup>Ultrastructural Research Team, Center for Biosystems Dynamics Research (BDR), Kobe  
13 650-0047, Japan

14 <sup>4</sup>Department of Cell Biology, Tokushima University Graduate School of Medical Science,  
15 Tokushima 770-8503, Japan

16 <sup>5</sup>Phyloinformatics Unit, Center for Biosystems Dynamics Research (BDR), Kobe 650-0047,  
17 Japan

18 <sup>6</sup>Animal Resource Development Unit and Genetic Engineering Team, Center for  
19 Biosystems Dynamics Research (BDR), Kobe 650-0047, Japan

20 <sup>7</sup>Division of Molecular & Cell Biology, Shigei Medical Research Institute, Okayama 701-  
21 0202, Japan

22 <sup>8</sup>Centre for Stem Cells and Regenerative Medicine, King's College London, London SE1  
23 9RT, UK

24 <sup>9</sup>Present address: Simmons Comprehensive Cancer Center, UT Southwestern Medical  
25 Center, Texas 75390, USA

26 <sup>10</sup>Present address: Department of Physical Therapy, Niigata University of Health and  
27 Welfare, Niigata 950-3198, Japan

28 <sup>11</sup>Co-first author

29 \*Correspondence: [hironobu.fujiwara@riken.jp](mailto:hironobu.fujiwara@riken.jp)

30

31 **Abstract**

32 The heterogeneity and compartmentalization of stem cells is a common principle in many  
33 epithelia, and is known to function in epithelial maintenance, but its other physiological  
34 roles remain elusive. Here we show transcriptional and anatomical contributions of  
35 compartmentalized epidermal stem cells (EpSCs) in tactile sensory unit formation in the  
36 hair follicle (HF). EpSCs in the follicle upper-bulge, where mechanosensory lanceolate  
37 complexes (LCs) innervate, express a unique set of extracellular matrix (ECM) and  
38 neurogenesis-related genes. These EpSCs deposit an ECM protein EGFL6 into the collar  
39 matrix, a novel ECM that tightly ensheathes LCs. EGFL6 is required for the proper  
40 patterning, touch responses, and  $\alpha v$  integrin-enrichment of LCs. By maintaining a quiescent  
41 original EpSC niche, the old bulge, EpSCs provide anatomically stable HF–LC interfaces,  
42 irrespective of the stage of follicle regeneration cycle. Thus, compartmentalized EpSCs  
43 provide a niche linking the HF and the nervous system throughout the hair cycle.

44

## 45 **Introduction**

46  
47 Tissue stem cells (SCs) in many epithelia, including the epidermis, intestine, mammary  
48 glands and lungs, often comprise heterogeneous populations with distinct transcriptional  
49 and anatomical features (Donati & Watt, 2015; Xin, Greco, & Myung, 2016). Individual SC  
50 pools contribute to tissue maintenance through different homeostatic and regenerative  
51 properties and give rise to distinct epithelial compartments, while they also hold plasticity  
52 to change their identity and function when perturbed. These recent findings question the  
53 traditional view of the role of stem cell heterogeneity, which underlies the theory of linear  
54 hierarchy (Goodell, Nguyen, & Shroyer, 2015). Although the biological significance of the  
55 heterogeneity and compartmentalization of epithelial SCs has primarily been studied in the  
56 context of epithelial tissue maintenance and regeneration, its other physiological roles  
57 remain unclear.

58 Hair follicles (HFs) are highly conserved touch sensory organs in the hairy skin that  
59 covers most of the mammalian body surface and detects touch signals essential for  
60 development and survival (Lumpkin, Marshall, & Nelson, 2010). HFs are innervated by  
61 mechanosensory end organs called lanceolate complexes (LCs), which are composed of  
62 parallel, longitudinally aligned low-threshold mechanoreceptor (LTMR) axonal endings  
63 and terminal Schwann cell (tSC) processes (Zimmerman, Bai, & Ginty, 2014). HFs are also  
64 connected to arrector pili muscles (APMs), thus forming a unique regenerating motile  
65 sensory organ. These two HF appendages attach to the permanent portion of the HF, known  
66 as the bulge, where epidermal stem cells (EpSCs) reside.

67 Hair follicle EpSCs are heterogeneous in their molecular and functional properties  
68 and compartmentalized along the longitudinal axis of the HF (Figure 1A) (Solanas &  
69 Benitah, 2013). The mid-bulge region contains CD34<sup>+</sup> slow-cycling EpSCs that serve as a  
70 reservoir of EpSCs and were once thought to be the master SCs at the top of the epidermal

71 hierarchy. A series of recent studies, however, identify several additional pools of different  
72 EpSCs around the bulge (e.g. in the isthmus, junctional zone, upper-bulge and hair germ).  
73 For example, the upper-bulge is a niche for *Glil*<sup>+</sup> EpSCs and they contribute to HF  
74 regeneration and wound healing of interfollicular epidermis (Brownell, Guevara, Bai,  
75 Loomis, & Joyner, 2011). The importance of EpSC heterogeneity and compartmentalization  
76 has almost entirely been explained by their role in regional tissue replenishment to maintain  
77 different functional compartments of the epidermis, but its roles apart from epidermal  
78 maintenance remain poorly understood. As coordinated epithelial–mesenchymal  
79 interactions are essential for HF development, regeneration and functioning, the unique  
80 signaling territories and tissue architecture provided by compartmentalized EpSCs probably  
81 regulate the interactions between the epidermis and a variety of HF-associated structures,  
82 including sensory nerves, APMs and the dermal papilla. Consistent with this idea, it has  
83 been reported that mid-bulge EpSCs create a specialized basement membrane containing  
84 nephronectin, thereby providing a niche for APM development and anchorage (Fujiwara et  
85 al., 2011). Follicle epidermis-derived BDNF is also critical for follicle-nerve interactions  
86 (Rutlin et al., 2014).

87 In this study, we set out to address the idea that upper-bulge EpSCs are molecularly  
88 and anatomically specialized for interaction with LCs and thus involved in generating the  
89 sense of touch. We demonstrated that upper-bulge EpSCs produce a special extracellular  
90 matrix (ECM) environment and unique epidermal tissue architecture that creates a stable  
91 HF–LC interface for tactile sensation. Thus, EpSC heterogeneity and compartmentalization  
92 appear to be important for both regional epidermal maintenance and patterned epithelial–  
93 mesenchymal interactions.

94

## 95 **Results**

### 96 **Upper-bulge EpSCs are molecularly specialized for HF–nerve interactions**

97 We first examined the global transcriptional features of distinct EpSC populations in the  
98 HF. To this end, we established FACS-based cell purification methods using several eGFP  
99 reporter mouse lines that label different SC compartments to isolate cellular subpopulations  
100 resident in the lower-isthmus (*Lgr6*<sup>+</sup>), upper-bulge (*Gli1*<sup>+</sup>), mid-bulge (CD34<sup>+</sup>), and hair  
101 germ (*Cdh3*<sup>+</sup>) as well as unfractionated basal EpSCs ( $\alpha 6$  integrin<sup>+</sup>) (Figure 1A and B, Figure  
102 1–figure supplement 1A). The purity of the isolated populations was verified by the  
103 expression of compartment-specific genes (Figure 1–figure supplement 1B and C, Materials  
104 and methods). We performed RNA-seq on these isolated cell populations. Gene Set  
105 Enrichment Analysis (GSEA) indicated that neurogenesis-related Gene Ontology (GO)  
106 terms are over-represented in *Gli1*<sup>+</sup> upper-bulge EpSCs (Figure 1C, Figure 1– table  
107 supplement 1). To further identify *Gli1*<sup>+</sup> compartment–enriched genes, we performed a  
108 pairwise transcriptional comparison between the *Gli1*<sup>+</sup> population and all the other  
109 populations and plotted the relationship between *Gli1*<sup>+</sup>-enriched gene sets in a Venn  
110 diagram (Figure 1D). Genes categorized in “Group I” were *Gli1*<sup>+</sup> population-enriched genes.  
111 We also extracted genes included in “Group II”, which contains genes highly expressed  
112 both in the *Gli1*<sup>+</sup> population and the CD34<sup>+</sup> population, since the *Gli1* and CD34 double-  
113 positive cells were included in the CD34<sup>+</sup> population in our sorting scheme (Figure 1D).  
114 Prominent gene-annotation clusters in both Group I and Group II cells encode proteins  
115 involved in nervous system development, including the neurotrophic factors *Grp*, *Bdnf* and  
116 *Nrt1* and the keratitis-ichthyosis-deafness syndrome gene *Gjb2* (Figure 1E and F). Multiple  
117 ECM genes are also upregulated in the upper-bulge compartment, including *Aspn*, *Crispld1*,  
118 *Egfl6*, and the deafness-related ECM genes *Col4a3* and *Col4a4* (Mochizuki et al., 1994)  
119 (Figure 1E and F). This global gene expression profiling of compartmentalized EpSCs

120 suggests that upper-bulge EpSCs are specialized both to interact with the nervous system  
121 and to express a unique set of ECM genes.

122

### 123 **Upper-bulge EpSCs deposit EGFL6 into the collar matrix**

124 It has been suggested that the ECM plays important roles in mammalian touch end organs,  
125 but the molecular identity and functions of this putative ultrastructure remain unknown  
126 (Lumpkin et al., 2010; Zimmerman et al., 2014). On examining the tissue localization of 15  
127 upper-bulge ECM proteins, we found that 8 ECM proteins were deposited in the upper-  
128 bulge (Figure 2A, Figure 2–table supplement 1). Among them, EGFL6 exhibited the most  
129 restricted localization in the upper-bulge of all types of dorsal HFs and showed a unique C-  
130 shaped pattern with a gap at the rostral side of the HF (Figure 2B).  $\beta$ III-tubulin staining  
131 showed that skin nerve endings terminate at the EGFL6 deposition sites (Figure 2B).  
132 Magnified 3D images revealed the close association of EGFL6 with longitudinal lanceolate  
133 parallel LTMR axonal endings of LCs, which are activated by tactile stimuli (Figure 2C)  
134 (Bai et al., 2015), and longitudinal processes of nestin-positive non-myelinating tSCs of  
135 LCs (Figure 2D). A close anatomical association of follicle EGFL6 with blood vessels has  
136 been reported (Xiao et al., 2013), but their direct contact was not observed (Figure 2E). To  
137 detect cells expressing *Egfl6* mRNA, we generated *Egfl6-H2b-Egfp* reporter mice. eGFP  
138 protein expression was enriched in upper-bulge EpSCs at the caudal side of the HF, but was  
139 not detected in dermal cells around the upper-bulge or dorsal root ganglia neurons that  
140 innervate to the upper bulge (Figure 2F and G).

141 To investigate the ultrastructural localization of EGFL6, we performed electron  
142 microscopic analysis of transverse sections of the upper-bulge. As described by Li and Ginty  
143 (2014), each LTMR axonal ending was sandwiched by processes of tSCs (Figure 2H). We  
144 identified an electron-dense amorphous ECM structure surrounding the LCs (black

145 arrowheads in Figure 2H). We named this novel structure the ‘collar matrix’, as it tightly  
146 ensheathes the LCs. tSC processes have two openings, at the follicular basement membrane  
147 and at the opposite side of the cell, thus exposing axonal endings and tSC processes to at  
148 least two different ECMs, the HF basement membrane and the collar matrix. Although  
149 EGFL6 is expressed by the upper-bulge EpSCs, an immunogold-labeled EGFL6 antibody  
150 was detected exclusively in the collar matrix (Figure 2I), indicating that upper-bulge EpSCs  
151 secrete EGFL6, which is incorporated in the collar matrix that ensheathes LCs (Figure 2J).

152

### 153 **EGFL6 mediates cell adhesion via $\alpha$ v integrins**

154  $\alpha$ 8 $\beta$ 1 integrin is the only reported cell adhesion receptor of EGFL6 (Osada et al., 2005), but  
155 its expression was not detected in LCs (data not shown). To explore other cell adhesion  
156 receptors for EGFL6, we purified recombinant EGFL6 protein and performed cell adhesion  
157 assays using nine cell lines. Of these, two glial and one skin fibroblast cell lines adhered to  
158 EGFL6, whereas other cell types, including keratinocytes, did not (Figure 2–figure  
159 supplement 1A and B), suggesting that although EGFL6 is derived from the upper-bulge  
160 EpSCs, these SCs are incapable of interacting with EGFL6, rather dermal cell lineages  
161 interact and adhere to EGFL6. A point mutation into the Arg-Gly-Asp (RGD) integrin  
162 recognition sequence of EGFL6 (RGE mutant) significantly reduced its cell adhesive ability  
163 (Figure 2–figure supplement 1C). Cell adhesion to EGFL6 was inhibited by the  $\alpha$ v integrin  
164 antibody, but not by the  $\beta$ 1 integrin antibody (Figure 2–figure supplement 1D). Consistent  
165 with these results,  $\alpha$ v integrin accumulated in LCs and colocalized with EGFL6 (Figure 2–  
166 figure supplement 1E). Deletion of EGFL6 decreased  $\alpha$ v integrin and impaired its  
167 accumulation (Figure 2–figure supplement 1E and F). Together, these results demonstrate  
168 that EGFL6 induces cell adhesion via  $\alpha$ v integrins that accumulate in the LCs in an EGFL6-  
169 dependent manner.



170

## 171 **EGFL6 is required for the proper patterning and touch responses of LCs**

172 One of the central roles of the specialized ECM around neural structures, such as the  
173 perineuronal nets, is to provide adhesive and non-adhesive physical structures to support  
174 cells and therefore determine their shape and functions (Mouw, Ou, & Weaver, 2014). Thus,  
175 we next examined the effect of deleting EGFL6 on LC structures in zigzag HFs, which are  
176 the most common HF type in rodent skin and innervated by A $\delta$ - and C-LTMRs (Li et al.,  
177 2011). *Egfl6* knockout mice showed misaligned and overlapping structures of axonal  
178 endings and tSC processes (Figure 3A and B). Quantitative 3D histomorphometrical  
179 analysis of LTMRs and tSCs revealed the significant increase of overlapping points of axons  
180 and tSC protrusions in *Egfl6* knockout mice (Figure 3A–C). The numbers and lengths of  
181 axonal endings were unchanged (Figure 3–figure supplement 1A and B). In *Egfl6* knockout  
182 tissue, the length, but not the width, of tSC processes was reduced (Figure 3–figure  
183 supplement 1C and D). *Egfl6* knockout mice did not show defects in the hair cycle (Figure  
184 3–figure supplement 1E and F). We conclude that EGFL6 is required for proper parallel  
185 patterning of LCs.

186 To determine whether EGFL6 is involved in mechanotransduction, we generated skin–  
187 nerve preparations and performed a single-nerve electrophysiological analysis of A $\delta$ -  
188 LTMRs, which are the most sensitive HF-associated LTMRs, stimulated by gentle touch  
189 and hair deflection (Bai et al., 2015; Rutlin et al., 2014; Zimmermann et al., 2009). Although  
190 the electrical responsiveness of A $\delta$ -LTMRs in *Egfl6* knockout skin remained intact (Figure  
191 3–table supplement 1), these receptors showed clear defects in mechanical responses. The  
192 median mechanical response threshold of A $\delta$ -LTMRs measured using von Frey hairs was  
193 significantly higher in knockout skin (Figure 3D). To more quantitatively analyze the  
194 mechanical sensitivity of these fibers, a light touch stimulus was applied using a piezo-

195 controlled micromanipulator (Figure 3–figure supplement 2A). Averaged touch response  
196 patterns showed that knockout skin exhibits fewer action potentials than wild-type skin at  
197 displacements of  $>32\ \mu\text{m}$  (Figures 3E, Figure 3–figure supplement 2B and C). The median  
198 threshold displacement of A $\delta$ -LTMRs was about three-times higher in the knockout (Figure  
199 3F). Significantly fewer action potentials were detected during the course of the touch  
200 stimulus protocol in *Egfl6* knockout skin (Figure 3G). These results indicate that EGFL6  
201 plays an important role in the excitation of A $\delta$ -LTMRs.

202

### 203 **The bulge provides stable epidermal–neuronal interfaces**

204 Unlike most other sensory systems, the HF undergoes dynamic structural changes during  
205 its periodic regeneration cycle (Figure 3–figure supplement 1E). It has remained unclear  
206 how HFs are able to maintain stable HF–LC interactions over the course of this cycle. To  
207 gain insight into this question, we first examined the changes that occur in the anatomical  
208 structure of the upper-bulge epidermis during the hair regeneration cycle. We found that at  
209 the first telogen (P20), the upper-bulge exhibits a single circular peripheral morphology  
210 with one hair shaft, while at the first anagen (P35), the upper-bulge perimeter doubles due  
211 to the formation of a new HF rostral to the existing HF (old bulge) (Figure 4A–C). At the  
212 second telogen (P49), the upper-bulge perimeter decreased due to a reduction in the new  
213 bulge perimeter. Thus, the external configuration of the rostral side of the upper-bulge  
214 epidermis changes dynamically during the HF regeneration cycle, while the caudal aspect  
215 remains stable.

216 We next examined the relationship between the dynamics of HF epidermal  
217 morphology and LC structure. We measured the signal intensities of immuno-stained LC  
218 components along the upper-bulge, and assigned average signal intensities to the position  
219 angle of HFs. At the first telogen, HFs exhibited relatively regular signal intensities along

220 the epidermal perimeter, but at the first anagen the new bulge (rostral side) showed areas of  
221 low signal intensity, while these remained unchanged at the old (caudal) bulge (Figure 4A  
222 and D). The low-intensity areas at new bulges became narrower in the second telogen. Both  
223 A $\delta$ - and C-LTMRs exhibited caudally polarized distribution in the second telogen (Figure  
224 4-figure supplement 1A). Consistent with these signal intensity data, EGFL6 and tSCs in  
225 the old bulge maintained regular parallel morphologies throughout the hair cycle, while  
226 those in the new bulge exhibited diverse morphologies and wider widths in the first anagen  
227 (Figure 4E, Figure 4-figure supplement 1B). Thus, the polarized distributions of LC  
228 components toward the caudal side of the HFs are induced as the new bulge structure forms  
229 at the rostral side of the HF. The caudal side of the HF, where the old bulge is maintained  
230 by quiescent EpSCs, does not change in morphology, suggesting that the old bulge stably  
231 preserves LCs irrespective of the stage of hair regeneration cycle.

232 Finally, we plucked a club hair, a retained hair from the previous hair cycle in the old  
233 bulge, to test whether the removal of the sensor probe and subsequent alteration of the old  
234 bulge architecture would affect the LC structure. The hairs were painted at the first telogen  
235 (P20) and the painted hairs (i.e., club hairs) were plucked when the new hair and bulge  
236 formed (Figure 4-figure supplement 1C). Three days after plucking, the old bulges  
237 regressed (Figures 4F, Figure 4-figure supplement 1D), the LCs disappeared from the  
238 caudal side of the upper-bulge, and ectopic LCs appeared at the rostral side of the upper-  
239 bulge (Figure 4F and G). Together these results indicate that the preservation of the old  
240 bulge epidermal structure provides a stable epidermal-neuronal interface and induces an  
241 LC structure oriented toward the caudal side of the HF. Rutlin et al. (2014) reported that  
242 caudally polarized localization of A $\delta$ -LTMRs underlies direction-selective responsiveness  
243 of A $\delta$ -LTMRs to hair deflection, suggesting that the unique tissue architecture generated by  
244 upper-bulge EpSCs is involved in the directional selectivity of the LCs.



## 246 **Discussion**

247 Our findings reveal transcriptional and anatomical roles of compartmentalized EpSCs in HF  
248 sensory unit formation (Figure 4H). Our previous study also showed that the mid-bulge  
249 EpSCs express many tendon-related genes and induce the differentiation of APMs and their  
250 correct anchorage to the bulge via secretion of the basement membrane protein nephronectin  
251 (Fujiwara et al., 2011). Deletion of nephronectin moves the muscle near the upper-bulge.  
252 The morphology of the LC was altered in the nephronectin mutant (Figure 4–figure  
253 supplement 1E–G), likely due to the changes in mechanical or geometrical environments of  
254 the upper-bulge by the mis-location of APMs. Therefore, we propose that the heterogeneous  
255 EpSCs are compartmentalized not only for efficient epidermal homeostasis and  
256 regeneration (Schepeler, Page, & Jensen, 2014), but also for defining patterned niches for  
257 specific epidermal–dermal interactions, in part through providing different ECM  
258 environments.

259 The biological significance of forming two bulges has not been well explained. A  
260 recent report by Lay, Kume, and Fuchs (2016) suggests that the two-bulge structure has an  
261 advantage for life-long HF epidermal maintenance as it increases the number of EpSCs and  
262 maintains SC quiescence by holding a keratin 6<sup>+</sup> inner bulge that expresses factors that  
263 inhibit SC activation. Our study now brings an entirely different perspective on the  
264 significance of the old bulge formation. We demonstrated that the formation and  
265 preservation of the old bulge provides a stable epidermal-neuronal interface and induces a  
266 LC structure oriented toward the caudal side of the hair follicle. Caudally polarized  
267 expression of BDNF in the bulge epidermis of developing HFs regulates caudally enriched  
268 localization of A $\delta$ -LTMRs, which underlies direction-selective responsiveness of A $\delta$ -  
269 LTMRs (Rutlin et al., 2014). Our data show that both A $\delta$ -LTMRs and C-LTMRs become  
270 caudally polarized after the formation of the two-bulge structure, indicating that the unique

271 tissue architecture provided by EpSCs is another major determinant of the formation,  
272 preservation and function of LCs in the HF.

273 The mechanisms to form and preserve proper innervation in regenerating HF have  
274 attracted attention. Botchkarev, Eichmuller, Johansson, and Paus (1997) reported the  
275 constant number of longitudinal nerve endings in the LCs in both natural and hair plucking-  
276 induced hair cycle. This invariance of nerve ending number, together with the unique  
277 epidermal tissue geometry and dynamics revealed in the present study, may underlie  
278 stability and topological reorganization of LCs during the hair cycle and in hair plucking-  
279 induced old bulge depletion.

280 We identified a novel electron-dense and amorphous ECM structure, which we  
281 named the collar matrix, that ensheathes LCs. The deletion of a collar matrix protein,  
282 EGFL6, impaired the structure and sensory function of LCs. The collar matrix has  
283 anatomical and functional features in common with the essential ECM in touch end organs  
284 of non-vertebrate organisms, such as the mantle in *C. elegans* (Emtage, Gu, Hartwig, &  
285 Chalfie, 2004). Thus, electron-dense amorphous ECMs are likely to be the fundamental  
286 ECM regulating sensory end organ formation and function in multicellular organisms.

287 In conclusion, our findings give a new perspective on the roles played by  
288 heterogeneous and compartmentalized EpSC populations in more global aspects of  
289 organogenesis, beyond their role in epithelial maintenance and regeneration. Our study also  
290 provides insights into how sensory organs take advantage of a stable niche provided by a  
291 quiescent EpSC compartment to maintain sensory function within a structurally dynamic  
292 tissue environment.

293

294 **Author Contributions**

295 C-C.C., K.T. and T.T. contributed equally to the study. C-C.C. and H.F. designed this study.  
296 C-C.C., N.S. A.N. and H.F. performed the mouse experiments. H.F., N.S., H.K. and Y.F.  
297 generated the *Egfl6-H2b-eGFP* mice. K.T. established the FACS protocols and purified the  
298 SC pools. K.T, C.T. and S.D.K. performed the RNA-seq and bioinformatics analysis. T.T.  
299 performed the electrophysiological analysis. C-C.C., K.K. and S.Y. performed the electron  
300 microscopic analysis. Y.T. provided COL4A3 and COL4A4 antibodies. F.M.W. oversaw  
301 the initial stage of this study. C-C.C., K.T., T.T. and H.F. wrote the paper with input from  
302 all authors.

303

304 **Acknowledgments**

305 We thank Shigehiro Kuraku, Yuichiro Hara, Osamu Nishimura of the RIKEN  
306 Phyloinformatics Unit for help in RNA-seq and bioinformatics; Hideki Enomoto for Ret-  
307 GFP mice; RIKEN Kobe light microscopy and animal facilities for technical assistance;  
308 Shigeo Hayashi and Douglas Sipp for their critical reading of the manuscript. We also thank  
309 the members of the Fujiwara laboratory for valuable reagents and discussion. This work  
310 was funded by RIKEN intramural funding, JSPS KAKENHI (25122720), Uehara Memorial  
311 Foundation, Takeda Science Foundation and Cosmetology Research Foundation (all to  
312 H.F.). C-C.C. was a recipient of the RIKEN-NSC Taiwan Fellowship. F.M.W.  
313 acknowledges financial support from the Medical Research Council, BBSRC and Wellcome  
314 Trust.

315

316 **Competing Interests**

317 The authors declare that no competing interests exist.

318

319 **References:**

- 320 Bai, L., Lehnert, B. P., Liu, J., Neubarth, N. L., Dickendesher, T. L., Nwe, P. H., . . . Ginty,  
321 D. D. (2015). Genetic Identification of an Expansive Mechanoreceptor Sensitive to  
322 Skin Stroking. *Cell*, *163*(7), 1783-1795. doi:10.1016/j.cell.2015.11.060
- 323 Botchkarev, V. A., Eichmuller, S., Johansson, O., & Paus, R. (1997). Hair cycle-dependent  
324 plasticity of skin and hair follicle innervation in normal murine skin. *J Comp Neurol*,  
325 *386*(3), 379-395.
- 326 Brownell, I., Guevara, E., Bai, C. B., Loomis, C. A., & Joyner, A. L. (2011). Nerve-derived  
327 sonic hedgehog defines a niche for hair follicle stem cells capable of becoming  
328 epidermal stem cells. *Cell Stem Cell*, *8*(5), 552-565. doi:10.1016/j.stem.2011.02.021
- 329 Donati, G., & Watt, F. M. (2015). Stem cell heterogeneity and plasticity in epithelia. *Cell*  
330 *Stem Cell*, *16*(5), 465-476. doi:10.1016/j.stem.2015.04.014
- 331 Driskell, R. R., Giangreco, A., Jensen, K. B., Mulder, K. W., & Watt, F. M. (2009). Sox2-  
332 positive dermal papilla cells specify hair follicle type in mammalian epidermis.  
333 *Development*, *136*(16), 2815-2823. doi:10.1242/dev.038620
- 334 Emtage, L., Gu, G., Hartwig, E., & Chalfie, M. (2004). Extracellular proteins organize the  
335 mechanosensory channel complex in *C. elegans* touch receptor neurons. *Neuron*,  
336 *44*(5), 795-807. doi:10.1016/j.neuron.2004.11.010
- 337 Fujiwara, H., Ferreira, M., Donati, G., Marciano, D. K., Linton, J. M., Sato, Y., . . . Watt, F.  
338 M. (2011). The basement membrane of hair follicle stem cells is a muscle cell niche.  
339 *Cell*, *144*(4), 577-589. doi:10.1016/j.cell.2011.01.014
- 340 Goodell, M. A., Nguyen, H., & Shroyer, N. (2015). Somatic stem cell heterogeneity:  
341 diversity in the blood, skin and intestinal stem cell compartments. *Nat Rev Mol Cell*  
342 *Biol*, *16*(5), 299-309. doi:10.1038/nrm3980



- 343 Jain, S., Golden, J. P., Wozniak, D., Pehek, E., Johnson, E. M., Jr., & Milbrandt, J. (2006).  
344 RET is dispensable for maintenance of midbrain dopaminergic neurons in adult mice.  
345 *J Neurosci*, 26(43), 11230-11238. doi:10.1523/JNEUROSCI.1876-06.2006
- 346 Jensen, U. B., Yan, X., Triel, C., Woo, S. H., Christensen, R., & Owens, D. M. (2008). A  
347 distinct population of clonogenic and multipotent murine follicular keratinocytes  
348 residing in the upper isthmus. *J Cell Sci*, 121(Pt 5), 609-617. doi:10.1242/jcs.025502
- 349 Koltzenburg, M., Stucky, C. L., & Lewin, G. R. (1997). Receptive properties of mouse  
350 sensory neurons innervating hairy skin. *J Neurophysiol*, 78(4), 1841-1850.
- 351 Lay, K., Kume, T., & Fuchs, E. (2016). FOXC1 maintains the hair follicle stem cell niche  
352 and governs stem cell quiescence to preserve long-term tissue-regenerating potential.  
353 *Proc Natl Acad Sci U S A*, 113(11), E1506-1515. doi:10.1073/pnas.1601569113
- 354 Li, L., & Ginty, D. D. (2014). The structure and organization of lanceolate mechanosensory  
355 complexes at mouse hair follicles. *Elife*, 3, e01901. doi:10.7554/eLife.01901
- 356 Li, L., Rutlin, M., Abaira, V. E., Cassidy, C., Kus, L., Gong, S., . . . Ginty, D. D. (2011).  
357 The functional organization of cutaneous low-threshold mechanosensory neurons.  
358 *Cell*, 147(7), 1615-1627. doi:10.1016/j.cell.2011.11.027
- 359 Lumpkin, E. A., Marshall, K. L., & Nelson, A. M. (2010). The cell biology of touch. *J Cell*  
360 *Biol*, 191(2), 237-248. doi:10.1083/jcb.201006074
- 361 Mochizuki, T., Lemmink, H. H., Mariyama, M., Antignac, C., Gubler, M. C., Pirson, Y., . . .  
362 et al. (1994). Identification of mutations in the alpha 3(IV) and alpha 4(IV) collagen  
363 genes in autosomal recessive Alport syndrome. *Nat Genet*, 8(1), 77-81.  
364 doi:10.1038/ng0994-77
- 365 Mouw, J. K., Ou, G., & Weaver, V. M. (2014). Extracellular matrix assembly: a multiscale  
366 deconstruction. *Nat Rev Mol Cell Biol*, 15(12), 771-785. doi:10.1038/nrm3902

- 367 Osada, A., Kiyozumi, D., Tsutsui, K., Ono, Y., Weber, C. N., Sugimoto, N., . . . Sekiguchi,  
368 K. (2005). Expression of MAEG, a novel basement membrane protein, in mouse  
369 hair follicle morphogenesis. *Exp Cell Res*, 303(1), 148-159.  
370 doi:10.1016/j.yexcr.2004.04.053
- 371 Rutlin, M., Ho, C. Y., Abraira, V. E., Cassidy, C., Bai, L., Woodbury, C. J., & Ginty, D. D.  
372 (2014). The cellular and molecular basis of direction selectivity of Adelta-LTMRs.  
373 *Cell*, 159(7), 1640-1651. doi:10.1016/j.cell.2014.11.038
- 374 Schepeler, T., Page, M. E., & Jensen, K. B. (2014). Heterogeneity and plasticity of  
375 epidermal stem cells. *Development*, 141(13), 2559-2567. doi:10.1242/dev.104588
- 376 Solanas, G., & Benitah, S. A. (2013). Regenerating the skin: a task for the heterogeneous  
377 stem cell pool and surrounding niche. *Nat Rev Mol Cell Biol*, 14(11), 737-748.  
378 doi:10.1038/nrm3675
- 379 Warming, S., Costantino, N., Court, D. L., Jenkins, N. A., & Copeland, N. G. (2005). Simple  
380 and highly efficient BAC recombineering using galK selection. *Nucleic Acids Res*,  
381 33(4), e36. doi:10.1093/nar/gni035
- 382 Xiao, Y., Woo, W. M., Nagao, K., Li, W., Terunuma, A., Mukoyama, Y. S., . . . Brownell,  
383 I. (2013). Perivascular hair follicle stem cells associate with a venule annulus. *J*  
384 *Invest Dermatol*, 133(10), 2324-2331. doi:10.1038/jid.2013.167
- 385 Xin, T., Greco, V., & Myung, P. (2016). Hardwiring Stem Cell Communication through  
386 Tissue Structure. *Cell*, 164(6), 1212-1225. doi:10.1016/j.cell.2016.02.041
- 387 Zimmerman, A., Bai, L., & Ginty, D. D. (2014). The gentle touch receptors of mammalian  
388 skin. *Science*, 346(6212), 950-954. doi:10.1126/science.1254229
- 389 Zimmermann, K., Hein, A., Hager, U., Kaczmarek, J. S., Turnquist, B. P., Clapham, D. E.,  
390 & Reeh, P. W. (2009). Phenotyping sensory nerve endings in vitro in the mouse. *Nat*  
391 *Protoc*, 4(2), 174-196. doi:10.1038/nprot.2008.223



393 **Figures**

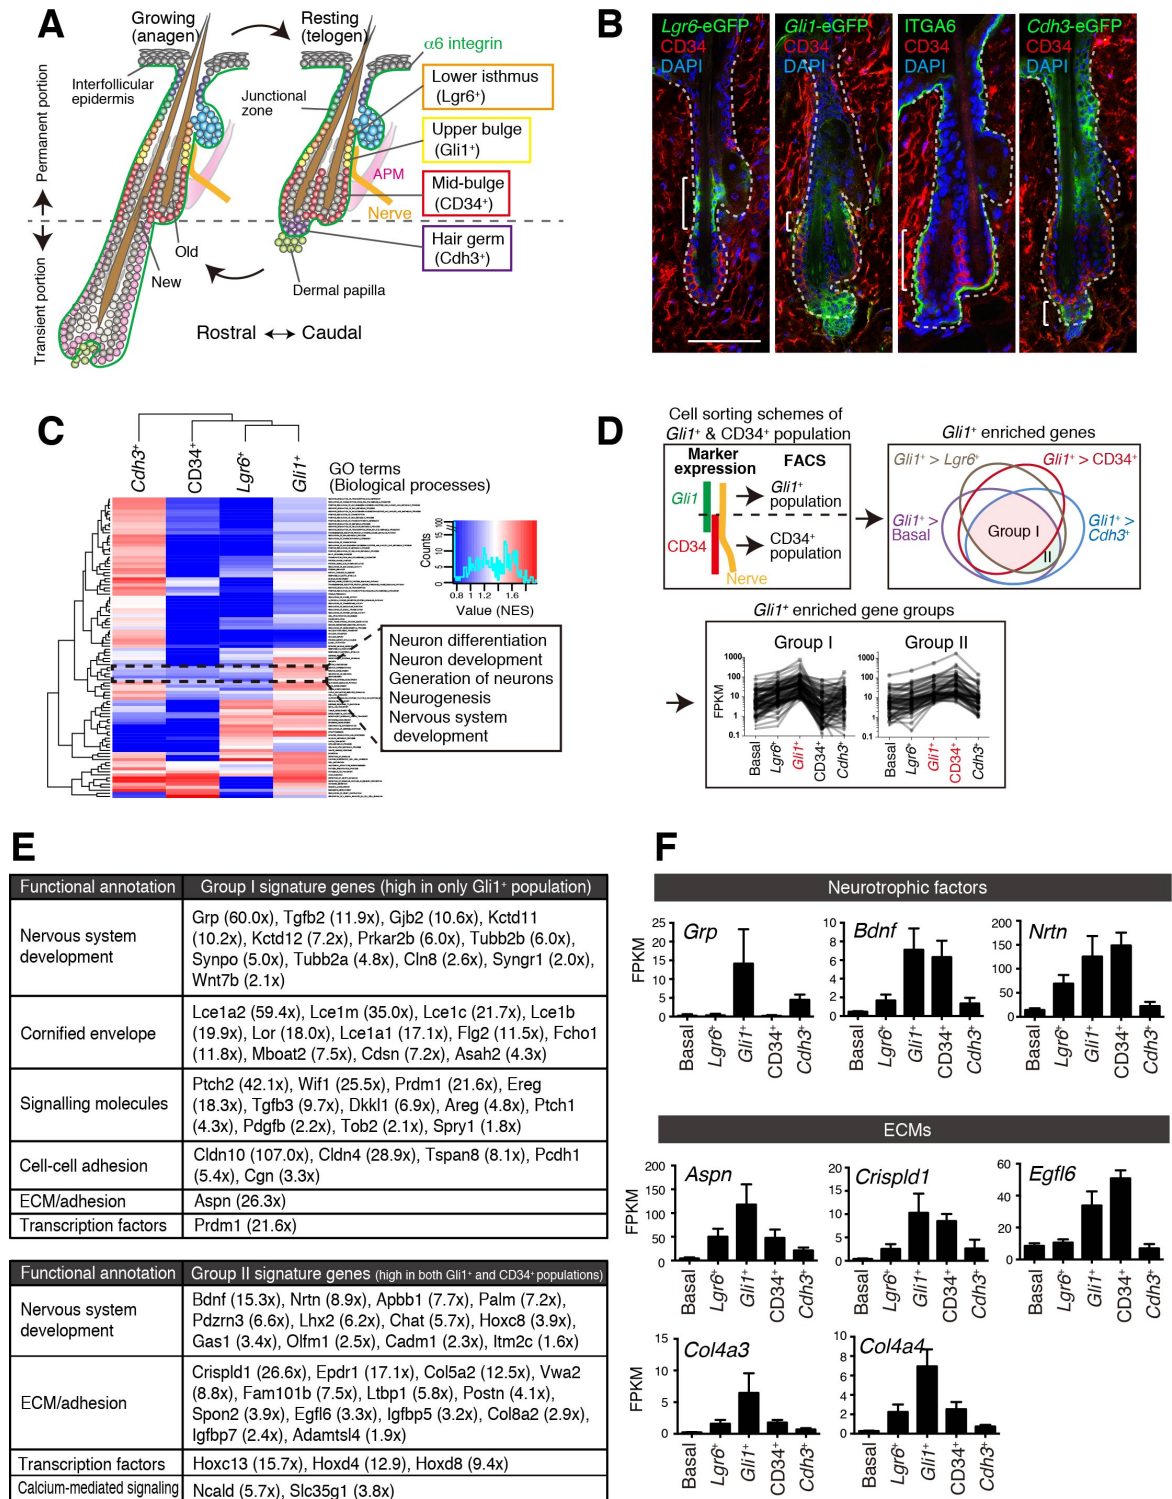

Fig. 1 Cheng *et al.*

394

395 **Figure 1. Upper-bulge EpSCs are molecularly specialized for HF–nerve interactions**

396 (A) Graphical illustration of EpSC compartments. APM, arrector pili muscle. (B) Distinct

397 EpSC compartments in 8-week-old telogen skin were visualized with specific eGFP  
398 reporters and cell surface markers. Brackets indicate target cell populations for sorting. (C)  
399 Z-score heat map representing the normalized enrichment score (NES) of GSEA using the  
400 transcriptome data of each EpSC population. (D) Scheme of the extraction of genes highly  
401 expressed in the *Gli1*<sup>+</sup> population (Group I) and in both the *Gli1*<sup>+</sup> and CD34<sup>+</sup> populations  
402 (Group II). (E) Lists of the genes highly expressed in *Gli1*<sup>+</sup> population (Group I) and in both  
403 *Gli1*<sup>+</sup> and CD34<sup>+</sup> populations (Group II). (F) Expression levels of neurotrophic factor and  
404 ECM genes highly expressed in upper-bulge SCs. Basal, basal EpSC pool. Data are mean ±  
405 SD, n = 3-4.  
406

**A**

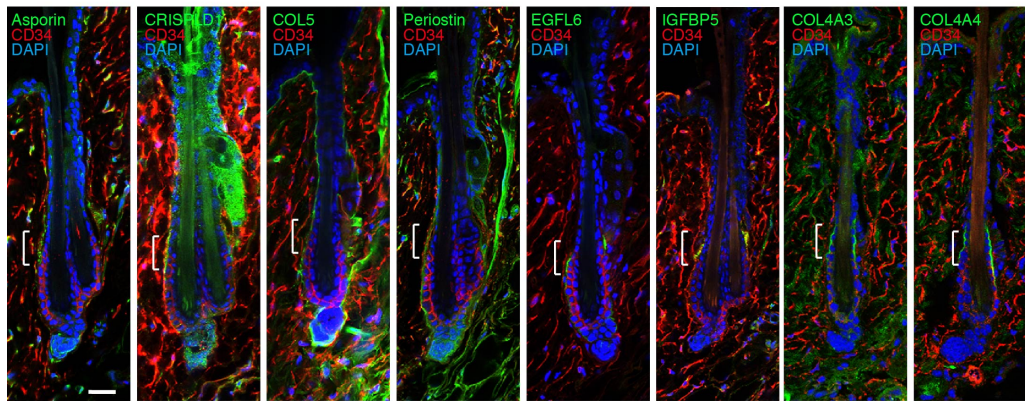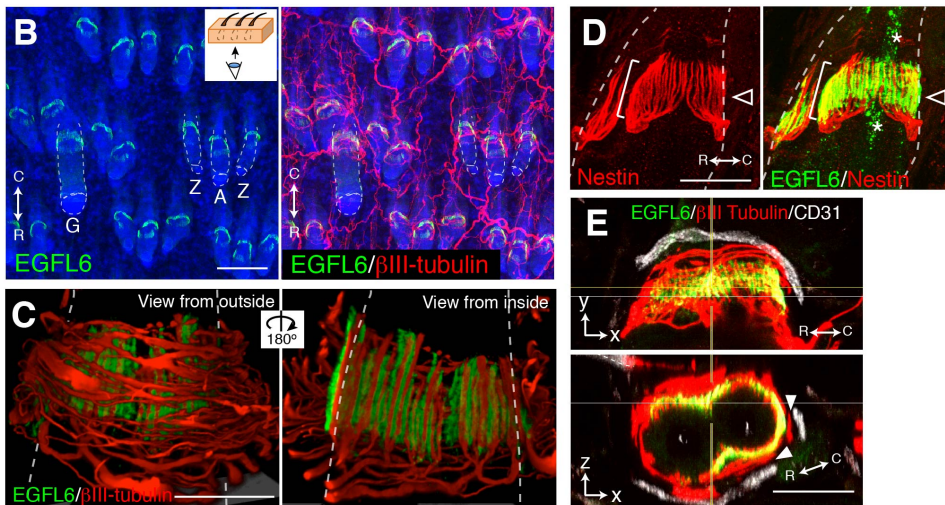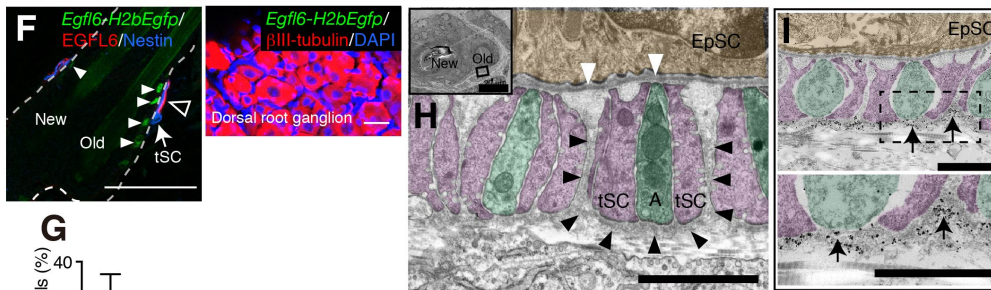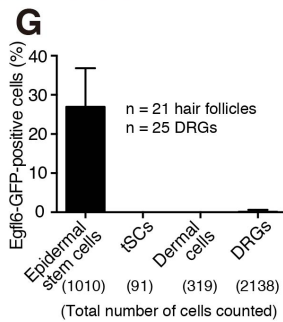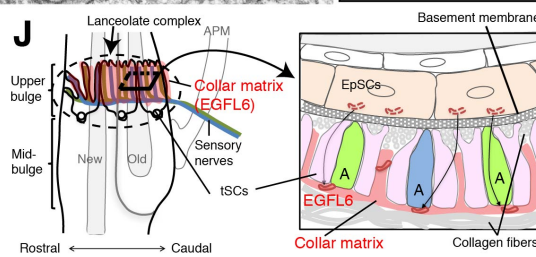

**Fig. 2 Cheng et al.**

407

408 **Figure 2. Upper-bulge EpSCs deposit EGFL6 into the collar matrix (A)**

409 Immunostaining pattern of upper-bulge-specific ECM in 8-week-old telogen skin. Brackets:

410 upper-bulge. **(B)** EGFL6 was colocalized with  $\beta$ III-tubulin<sup>+</sup> nerve endings in the upper-  
411 bulge of dorsal guard ('G'), awl/auchene ('A') and zigzag ('Z') HF. **(C)** Magnified images  
412 of EGFL6 and  $\beta$ III-tubulin in telogen skin. **(D)** The protrusions of the tSCs (white brackets)  
413 were colocalized with EGFL6 in the upper-bulge of 8-week-old telogen HF (open  
414 arrowheads). Asterisks: nonspecific signals. **(E)** CD31<sup>+</sup> blood vessels did not show direct  
415 contact to EGFL6 in 7-week-old telogen HF. Arrowheads: gaps between EGFL6 (green)  
416 and blood vessels (white). **(F)** The dorsal skin and dorsal root ganglia (DRG) of an 8-week-  
417 old *Egfl6-H2b-Egfp* mouse was stained for eGFP, EGFL6, nestin and  $\beta$ III-tubulin. eGFP  
418 (closed arrowheads) staining was observed in the upper-bulge (open arrowhead) epidermis  
419 of old bulge (Old), but not in other cellular components around the upper-bulge. **(G)**  
420 Statistical examination of *Egfl6*-H2BeGFP-positive cells around the upper bulge. Data are  
421 mean  $\pm$  SD. **(H)** A transmission electron microscopic image of the upper-bulge of P35  
422 zigzag HF. An electron-dense amorphous ECM structure, the collar matrix (black  
423 arrowheads), ensheathed LC endings [A, axon (green); tSC (pink); EpSC (gold); white  
424 arrowheads, epidermal basement membrane]. **(I)** The EGFL6-gold particles were localized  
425 in the collar matrix (arrows). **(J)** Schematic representation of the localization of EGFL6 in  
426 the upper-bulge. Scale bars, 10  $\mu$ m (A), 20  $\mu$ m (C-F), 100  $\mu$ m (B), 2  $\mu$ m (H), 1  $\mu$ m (I).  
427

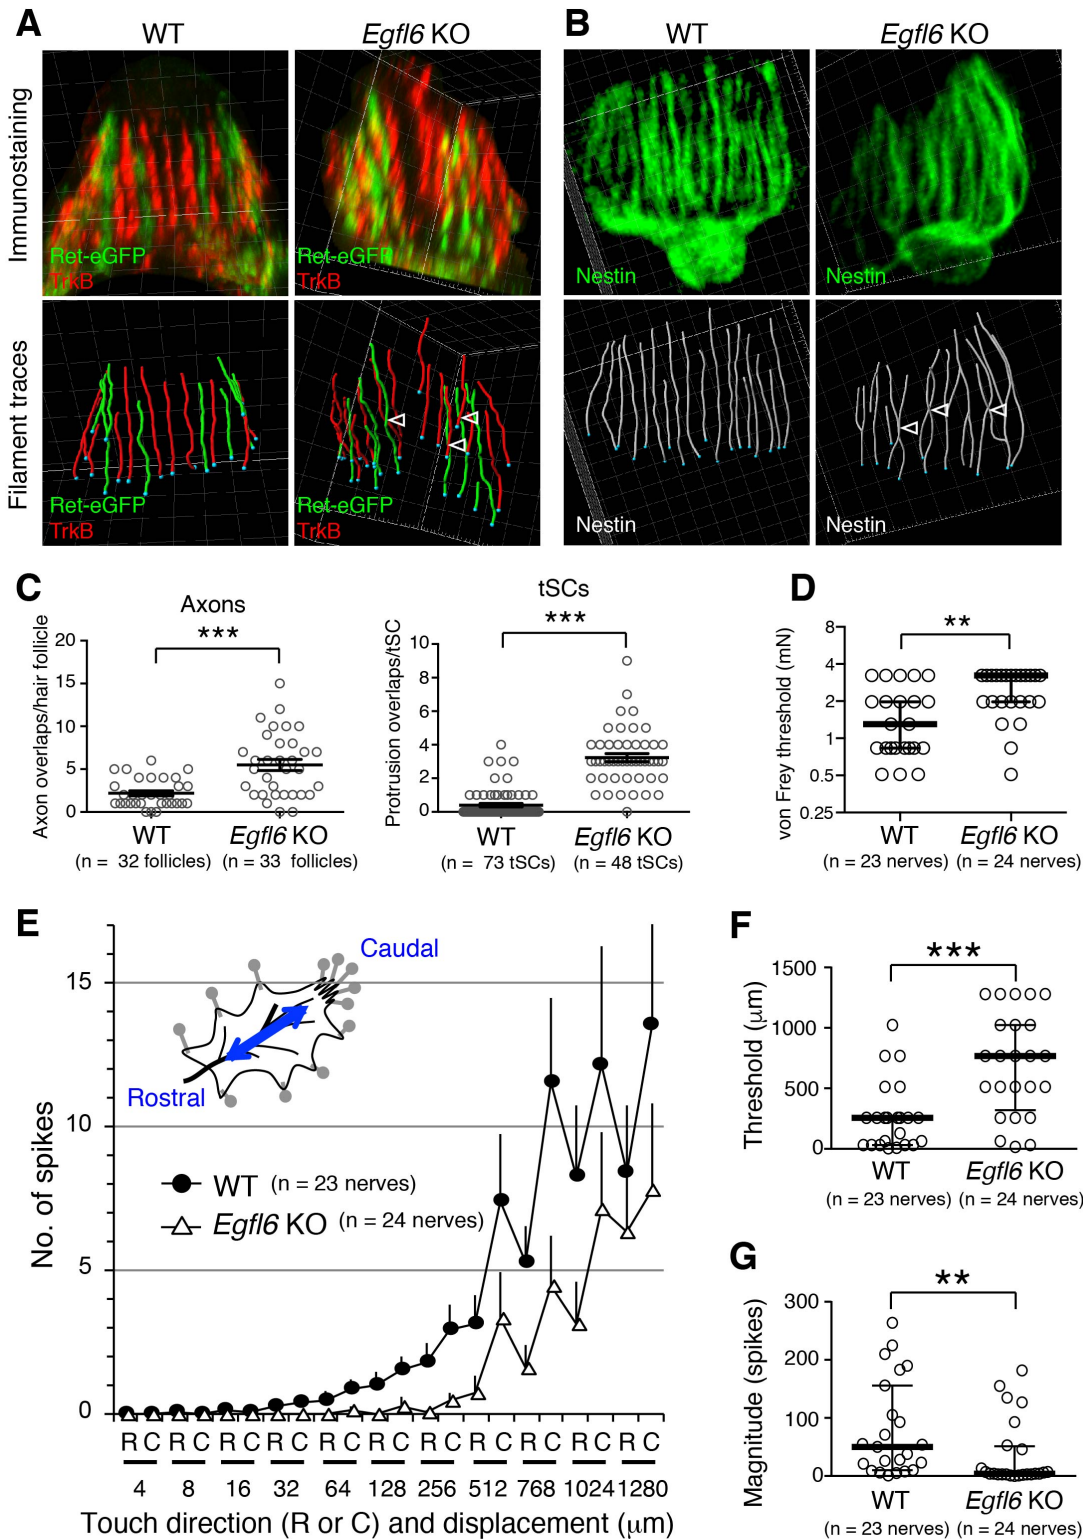

Fig. 3 Cheng *et al.*

428

429 **Figure 3. EGFL6 is required for the patterning and touch responses of LCs (A and B)**

430 3D reconstituted images and filament tracings of axonal endings (A) and tSCs (B) in the old

431 bulge of wild-type and *Egfl6* knockout 8-week-old skin. *Ret*-eGFP, a marker for C-LTMRs



432 and TrkB, a marker for A $\delta$ -LTMRs. Open arrowhead: overlapping points of axonal endings  
433 and tSC processes. Grid width, 5  $\mu$ m. (C) Overlapping points of axonal endings and tSC  
434 processes were counted. Data are mean  $\pm$  SEM. Two-tailed unpaired *t*-test. (D) Mechanical  
435 sensitivity of A $\delta$ -LTMRs was analyzed using von Frey hairs in wild-type and *Egfl6*  
436 knockout skin–nerve preparations from 10-12 week-old telogen skin. (E) Touch response  
437 patterns of A $\delta$ -LTMRs in wild-type and *Egfl6* knockout skin–nerve preparations. A ramp-  
438 and-hold touch stimulus was applied using a piezo-controlled micromanipulator (see  
439 Methods and Figure 3–figure supplement 2A). (F) Threshold displacement of A $\delta$ -LTMRs.  
440 (G) Number of action potentials during the course of the touch stimulus protocol (i.e.,  
441 magnitude of touch responses) was measured. Data in (D, F, G) are median with  
442 interquartile range (IQR) and in (E) are mean  $\pm$  SEM. Statistics: Mann-Whitney U-test (D,  
443 F, G).

444

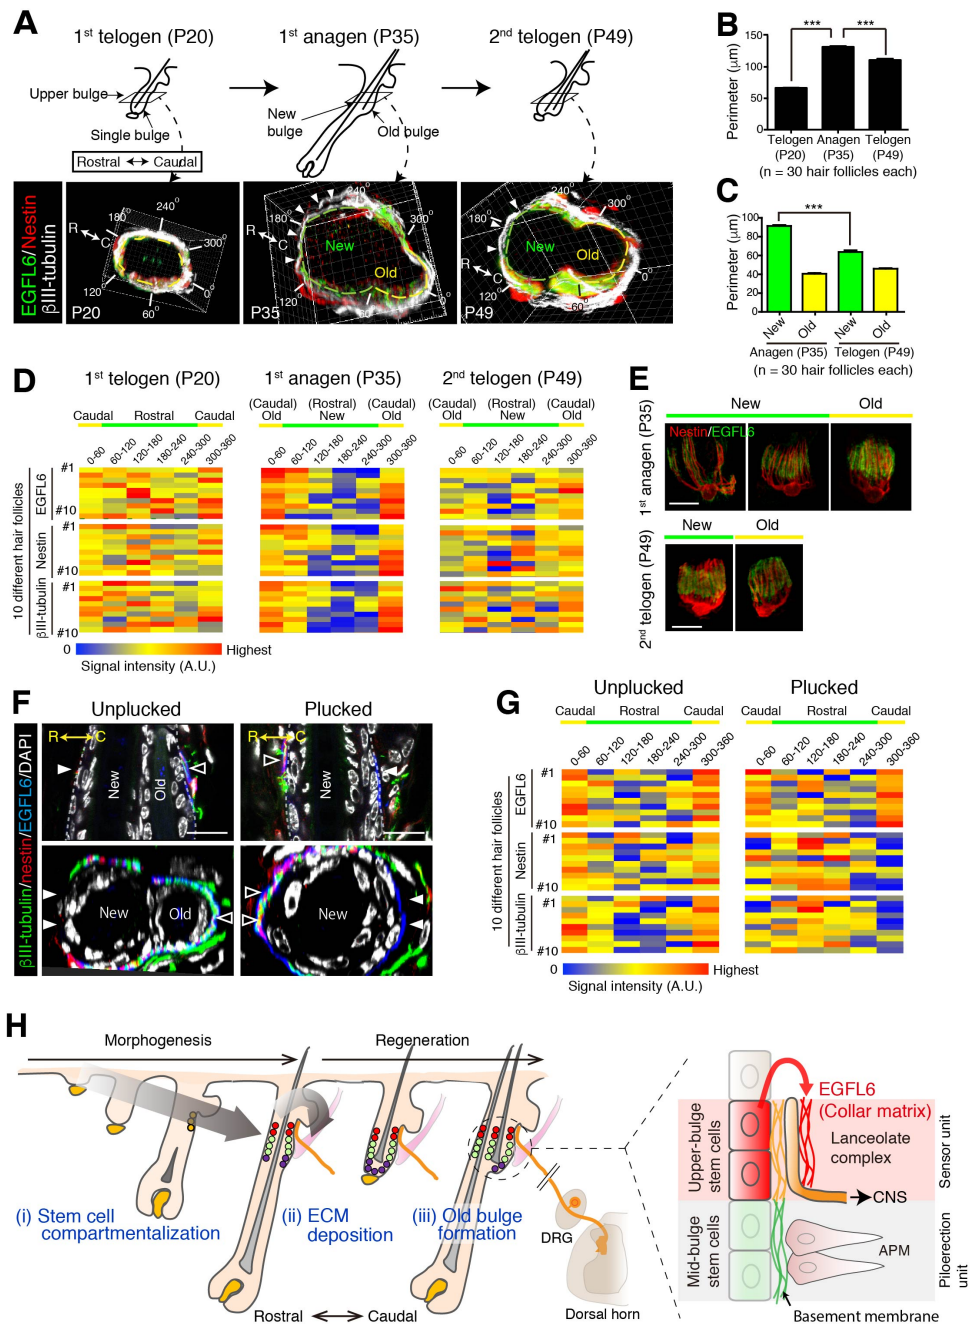

Fig. 4 Cheng *et al.*

445

446 **Figure 4. The old bulge provides stable epidermal–neuronal interfaces** (A) Structural  
 447 changes of the upper-bulge during the HF regeneration cycle. Cross-sectional views of the  
 448 upper-bulge of zigzag HF are shown. Closed arrowheads indicate a large gap of LCs. (B)  
 449 Perimeter length of the upper-bulge and (C) the upper-bulge of new and old bulges. (D)  
 450 Heat map of the relative signal intensity levels of EGFL6, nestin and βIII-tubulin along the

451 upper-bulge perimeter. Geometry of the upper-bulge perimeter is shown above the heat map.  
452 **(E)** Morphological differences of EGFL6/tSC complexes in new and old bulges. **(F)** Sagittal  
453 and transverse sectional views of the upper-bulge in P35 anagen HF<sub>s</sub> with the club hair  
454 unplucked and plucked. Open and closed arrowheads indicate areas with and without LCs,  
455 respectively. **(G)** Heat map of the relative signal intensity levels of EGFL6, nestin and  $\beta$ III-  
456 tubulin along the upper-bulge perimeter in HF<sub>s</sub> with the club hair unplucked and plucked.  
457 **(H)** Schematic summary of the contribution of EpSCs to sensory unit formation. (i) During  
458 development, EpSCs for HF–nerve interactions are induced and compartmentalized in the  
459 upper-bulge. (ii) Upper-bulge EpSCs provide specialized ECM and neurogenetic  
460 environments for LCs. (iii) EpSCs maintain an old bulge at the caudal side of the HF,  
461 providing stable HF–nerve interfaces. Scale bars, 10  $\mu$ m.  
462

## 463 **Materials and methods**

### 464 **Mice**

465 *Egfl6* knockout mice (032277-UCD) were obtained from the Mutant Mouse Resource &  
466 Research Centers (MMRRC). Lack of *Egfl6* mRNA and EGFL6 protein were confirmed by  
467 *in situ* hybridization and immunostaining. *Egfl6-H2b-Egfp* BAC transgenic mice were  
468 generated as described below. *Ret-eGFP* knock-in mice have been described previously  
469 (Jain et al., 2006) and kindly provided by H. Enomoto (Kobe University). *Lgr6-GFP-ires-*  
470 *CreERT2* mice were obtained from Jackson Laboratory. *Gli1-eGFP* mice (STOCK  
471 Tg(Gli1-EGFP)DM197Gsat/Mmucd) and *Cdh3-eGFP* mice (STOCK Tg(Cdh3-  
472 EGFP)BK102Gsat/Mmnc) were obtained from MMRRC. Mouse lines used for  
473 transcriptome analysis were backcrossed with C57BL/6N mice more than 4 times.  
474 C57BL/6N and BALB/c mice were obtained from Japan SLC Inc. *Npnt* floxed mice were  
475 obtained from Jackson Laboratory and crossed with keratin 5-Cre mice from the Jose  
476 Jorcano laboratory. All animal experiments were conducted and performed in accordance  
477 with approved Institutional Animal Care and Use Committee protocols.

478

### 479 **Generation of the *Egfl6-H2b-Egfp* mouse line**

480 *Egfl6-H2b-Egfp* BAC transgenic mice (Accession No. CDB0518T:  
481 <http://www2.clst.riken.jp/arg/TG%20mutant%20mice%20list.html>) were generated by  
482 introducing a BAC carrying a *H2b-Egfp* transgene just before the ATG of the mouse *Egfl6*  
483 gene. The BAC clone RP23-124O13, containing the full genomic sequence of *Egfl6*, was  
484 obtained from CHORI BACPAC Resources Center. The *H2b-Egfp* fusion gene was  
485 introduced just before the first coding ATG of the *Egfl6* gene in the BAC clone using a two-  
486 step selection BAC recombineering protocol (Warming, Costantino, Court, Jenkins, &  
487 Copeland, 2005). The modified BAC construct was purified with a NucleoBond Xtra Midi

488 kit (Macherey-Nagel) and injected into the pronuclei of fertilized one-cell mouse eggs  
489 derived from the breeding of BDF1 and C57BL/6N mice. Potential founder mice were  
490 screened by genomic PCR of ear biopsy DNA with following primers: 5'-  
491 CCAAGGTCCTGACCAGCGAAG-3' and 5'- CCTTAGTCACCGCCTTCTTGGAG -3'  
492 (product size: 163 base pairs). These primers were also used for routine genotyping of this  
493 mouse line. The transgene-positive founder mice were bred with wild-type C57BL/6N mice  
494 and some of the offspring were used for immunostaining of eGFP to confirm the expression  
495 and nuclear localization of the H2B-eGFP protein. We have established 16 nuclear-GFP-  
496 positive transgenic mouse lines and confirmed the GFP expression in the upper bulge in 13  
497 mouse lines.

498

#### 499 **Cell lines**

500 Cell lines used in this study were 293F cells (Thermo Fisher), human primary keratinocytes  
501 (Watt lab), human embryonic kidney epithelial cell line HEK293 (RIKEN Bioresource  
502 Center), human glioblastoma cell line T98G (JCRB Cell Bank), Human glioma cell line  
503 KG-1-C (JCRB Cell Bank), human skin fibroblast cell line SF-TY (JCRB Cell Bank),  
504 human embryonic fibroblast cell line NTI-4 (JCRB Cell Bank), human sarcoma cell line  
505 HT-1080 (JCRB Cell Bank), human myelogenous leukemia cell line K562 (JCRB Cell  
506 Bank) and human myelogenous leukemia cell line transfected with human integrin  $\alpha 8$   
507 cDNA K562-a8 (Gift from L. Reichardt).

508 Human primary keratinocytes were cultured on irradiated J2 feeder cells with  
509 DMEM/Ham's F12 medium supplemented with 10% FBS, 0.5  $\mu\text{g/ml}$  hydrocortisone  
510 (Sigma), 0.1 nM cholera toxin (Sigma), 10  $\mu\text{g/ml}$  EGF (Peprotech), 2 mM GlutaMax  
511 (Invitrogen) and 5  $\mu\text{g/ml}$  Insulin (Sigma) at 37 °C under 5% CO<sub>2</sub>. Other cell lines were  
512 cultured according to the cell culture instructions from each source cell bank or company.

513

## 514 **Antibodies**

515 Antibodies used in this study were listed in Table 1.

516

## 517 **Generation of antibodies**

518 Rabbit antiserum to mouse EGFL6 was generated by immunizing rabbits with a Myc-His-  
519 tagged Mucin-MAM domain of recombinant mouse EGFL6 (S257-G550). The antigen was  
520 expressed in the 293F mammalian expression system (Invitrogen) and purified from the  
521 supernatant of the transfected cells with a Ni-NTA column. The antibody in the antiserum  
522 was affinity-purified with an antigen conjugated CNBr-activated Sepharose 4B. The  
523 specificity of the antibody to mouse EGFL6 was confirmed by the absence of the antibody  
524 immunoreactivity to tissue samples from *Egfl6* knockout mice. Rabbit antiserum to mouse  
525 nephronectin was generated by the same method described above. Recombinant flag-tagged  
526 full-length mouse nephronectin was expressed in 293F cells and purified with a FLAG-M2  
527 immuno-affinity column (Sigma). The antibody in the antiserum was affinity-purified with  
528 a CNBr-activated Sepharose 4B conjugated with purified His-tagged mouse full-length  
529 nephronectin. The specificity of the antibody to mouse nephronectin was confirmed by the  
530 absence of the antibody immunoreactivity to tissue samples from *Npnt* knockout mice.

531

## 532 **FACS**

533 Mouse adult dorsal telogen keratinocytes were isolated and stained for cell surface markers  
534 as described previously (Fujiwara et al., 2011) with some modifications. We utilized *Lgr6*-  
535 *GFP-ires-CreERT2*, *Gli1-eGFP* and *Cdh3-eGFP* mice to fluorescently visualize the  
536 epidermal stem cells in the lower isthmus (*Lgr6*<sup>+</sup>), upper bulge (*Gli1*<sup>+</sup>), and hair germ  
537 (*Cdh3*<sup>+</sup>) with eGFP. Dissected dorsal skin of the 8-week-old female mice was treated with

538 0.25% trypsin solution (Nakalai tesque) at 37°C for 1 hr. The epidermal tissue was scraped  
539 off from the dermal tissue with a scalpel. This epidermis separation protocol leaves hair  
540 germ cells in the dermal tissue. Effectiveness of this tissue separation was verified by the  
541 following qRT-PCR, RNA-seq and immunohistochemical analyses with compartment-  
542 specific markers as described below. For the sorting of lower isthmus (*Lgr6*-eGFP<sup>+</sup>), upper-  
543 bulge (*Gli1*-eGFP<sup>+</sup>) and mid-bulge (CD34<sup>+</sup>) epidermal stem cells, the separated epidermis  
544 was minced with scalpels and mixed with repeated pipetting to make a single cell suspension.  
545 To deplete haematopoietic and endothelial cells (lineage-positive cells; Lin<sup>+</sup>), the cell  
546 suspension was stained with PE-Cy7-conjugated antibodies for CD45, TER-119 and CD31.  
547 To sort the target cells, the cell suspension was also stained with Sca-1-PerCP-Cy5.5, CD34-  
548 eFluor660, CD49f (integrin  $\alpha$ 6)-PE. Sca-1 was used to remove epidermal basal cells of the  
549 interfollicular epidermis and follicle infundibulum (Jensen et al., 2008). Cells were sorted  
550 with a FACS Aria II according to the expression of cell surface markers, after gating out  
551 dead and Lin<sup>+</sup> cells (Figure 1–figure supplement 1A).

552 Hair germ epidermal cells (*Cdh3*-eGFP<sup>+</sup>) were sorted from the remaining dermal  
553 tissue since the most hair germ epidermal cells were retained in the dermal tissue after the  
554 separation of the epidermis. The dermal tissue was minced with scalpels and incubated with  
555 2 mg/ml of collagenase type I at 37°C for 2 hr with gentle mixing. Single cell suspension  
556 was obtained by repeated pipetting. The cell suspension was stained with the same  
557 antibodies used above and subjected to the sorting procedure.

558 The purity of sorted cells was confirmed by qRT-PCR with compartment-specific  
559 genes: *Lrig1* (junctional zone and lower-isthmus), *Lgr6* (lower-isthmus and upper bulge),  
560 *Gli1* (upper-bulge and hair germ), *Bdnf* (upper-bulge), *Cd34* (mid-bulge), *Cdh3* (hair germ)  
561 (Figure 1–figure supplement 1B). While the expression of *Gli1*-eGFP was detected in both  
562 upper-bulge and hair germ regions (Figure 1B), our cell isolation and sorting methods gave

563 highly pure upper-bulge cells and hair germ cells, respectively. For example, a marker for  
564 upper-bulge cells, *Bdnf*, was highly enriched in *Gli1*<sup>+</sup> upper bulge cells, but not in *Cdh3*<sup>+</sup>  
565 hair germ cells (Figure 1–figure supplement 1B). On the other hand, the expression of *Cdh3*,  
566 a marker for hair germ cells, was high in the *Cdh3*<sup>+</sup> hair germ population, but was very low  
567 in the *Gli1*<sup>+</sup> upper-bulge population (Figure 1–figure supplement 1B). We identified *Spon1*  
568 as a gene exclusively expressed in the hair germ from our gene expression profiling of  
569 isolated stem cell populations and confirmed that it was not detected in the *Gli1*<sup>+</sup> upper-  
570 bulge population (Figure 1–figure supplement 1C). Subsequent protein tissue-localization  
571 analysis of compartment-specific genes, which were identified in our gene expression  
572 profiling, further confirmed the validity and purity of sorted cells. For example, gene  
573 products of upper-bulge-enriched ECM genes, including *Aspn*, *Crispld1*, *Egfl6*, *Col4a3* and  
574 *Col4a4*, were deposited in the upper-bulge (Figure 2A), while SPON1 protein was localized  
575 in the hair germ region, but not in the upper-bulge. Collectively, our data demonstrate that  
576 the purity of each isolated stem cell population was very high.

577

#### 578 **qRT-PCR**

579 Total RNA was extracted from the sorted cells using an RNeasy micro kit (Qiagen). qRT-  
580 PCR was performed to determine target cell populations using Power SYBR Green PCR  
581 Master Mix (Life Technologies) with specific primer sets (Table 2) on 7900HT real-time  
582 PCR system (Applied Biosystems).

583

#### 584 **RNA library preparation and sequencing**

585 For each library, isolated total RNA samples were quantified with the Qubit RNA HS Assay  
586 Kit on a Qubit Fluorometer (Thermo Fisher Scientific), and their qualities were analyzed  
587 with the RNA 6000 Pico Kit on a 2100 Bioanalyzer (Agilent Technologies). Qubit



588 measurements were used to ensure that each library was prepared with 10 ng of total RNA.  
589 Library preparation was processed following the TruSeq Stranded mRNA Sample Prep Kit  
590 (Illumina) protocol till adapter ligation, except that the duration of the initial RNA  
591 fragmentation was shortened to 7 minutes. The adapter-ligated cDNA was amplified with  
592 14 PCR cycles. The prepared libraries were sequenced using the Rapid Run mode with 80  
593 cycles on the HiSeq1500 (Illumina), operated by HiSeq Control Software v2.2.58 using  
594 HiSeq SR Rapid Cluster Kit v2 (Illumina) and HiSeq Rapid SBS Kit v2 (Illumina). Base  
595 calling was performed with RTA v1.18.64 and the fastq files were generated with bcl2fastq  
596 v1.8.4 (Illumina).

597

#### 598 **Mapping and expression quantification**

599 Qualities of the RNA-seq reads were evaluated with FastQC v0.11.3. The program  
600 fastq\_quality\_filter, part of the FASTX Toolkit v0.0.14, was used to trim bases with a  
601 quality value below 30. Additionally, if more than 20% of the bases of a read were removed  
602 by this trimming procedure, then the whole read was discarded. Once this quality trim was  
603 completed, Trim\_galore v0.3.3 was executed to remove adapter sequences from the 3'-ends  
604 of reads, and to discard reads that were shorter than 50nt. The processed reads were mapped  
605 to the mm10 mouse genome assembly, obtained from iGenomes  
606 ([http://support.illumina.com/sequencing/sequencing\\_software/igenome.html](http://support.illumina.com/sequencing/sequencing_software/igenome.html)), using the  
607 splice-aware aligner TopHat v2.0.14 with default parameter settings. Reads mapping to  
608 ribosomal DNA accounted for ~1% of the total number of reads in each library, and were  
609 removed. Details for each library concerning sequencing and read statistics, including the  
610 total amount that uniquely mapped to the genome, are displayed in Table 3.

611 Gene expression quantification was performed using the Cuffdiff program in the  
612 Cufflinks package v2.2.1, with the frag-bias-correction and multi-read-correction options

613 enabled. Cuffdiff used the mm10 gene model obtained from iGenomes to estimate the  
614 number of fragments that originated from individual genes. For each gene, in addition to  
615 this produced raw count data, Cuffdiff also calculated normalized expression values, which  
616 are referred to as fragments per kilobase of transcript per million mapped reads (FPKM).

617

### 618 **GO and clustering analysis**

619 FPKM values from RNA-seq data were analysed by Gene Ontology (GO) term enrichment  
620 analysis. Genes with low expression (FPKM < 5) were filtered out and considered not  
621 expressed. Then the remaining FPKM values were log<sub>2</sub>-transformed for further analysis.  
622 To characterize global gene expression profiles of each epidermal stem cell population, gene  
623 set enrichment analysis (GSEA) was performed using GSEA software (2.2.2 from Broad  
624 Institute) with GO biological processes as a gene set collection (c5.bp.v5.1.symbols.gmt).  
625 In this analysis, pairwise differences between basal epidermal stem cells and each epidermal  
626 stem cell population were examined. The normalized enrichment score (NES) and False  
627 Discovery Rate (FDR) were calculated for each gene set and compared among cell  
628 populations using a bioconductor R with heatmap.2 gplots package.

629

### 630 **Immunohistochemistry and imaging**

631 Whole-mount immunostaining and horizontal imaging of mouse dorsal skin were  
632 performed as described previously (Fujiwara et al., 2011). Vertical whole-mount imaging  
633 of dorsal and whisker skin was performed as described below. Mouse skin tissues were  
634 dissected and fixed with 4% paraformaldehyde/PBS for 1 hr at 4°C. Fixed tissues were  
635 washed and embedded in OCT compound and frozen on liquid nitrogen. Vertical skin  
636 sections (150 µm thick) were made using a cryostat (Leica) and washed with PBS to remove  
637 remnant OCT compound. Skin sections were blocked with a blocking buffer (0.5% skim

638 milk/0.25% fish skin gelatin/0.5% Triton X-100/PBS) for 1 hr at 4°C and then incubated  
639 with primary antibodies diluted in blocking buffer overnight at 4°C. Skin samples were  
640 washed with 0.2% Tween 20/PBS for 4 hr and then incubated with DAPI and secondary  
641 antibodies diluted in blocking buffer overnight at 4°C. Finally, skin samples were washed  
642 with 0.2% Tween20/PBS for 4 hr at 4°C and mounted with BABB clearing solution. Images  
643 were acquired using a Leica TSC SP8. Z stack maximum projection images and three  
644 dimensional reconstructed images of skin whole-mount preparation were produced using  
645 Imaris 4D rendering software (Bitplane) and Volocity 3D imaging software (Perkin Elmer).

646

#### 647 **Transmission electron microscopy**

648 Dissected skin tissues were immediately immersed in 2% fresh formaldehyde and 2.5%  
649 glutaraldehyde in 0.1M sodium cacodylate buffer (pH 7.4), sliced into 0.5-1 mm-thin  
650 sections with a scalpel and fixed for 2 hr at room temperature. After washing three times  
651 with 0.1M cacodylate buffer (pH 7.4) for 5 min, tissues were post-fixed with ice-cold 1%  
652 OsO<sub>4</sub> in the same buffer for 2 hr. Samples were rinsed with distilled water, stained with  
653 0.5% aqueous uranyl acetate for 2 hr or overnight at room temperature, then dehydrated  
654 with ethanol and propylene oxide, and embedded in Poly/Bed 812 (Polyscience). Ultra-thin  
655 sections were cut, doubly-stained with uranyl acetate and Reynold's lead citrate, and viewed  
656 with a JEM 1010 or JEM 1400 plus transmission electron microscope (JEOL) at an  
657 accelerating voltage of 100 kV.

658

#### 659 **Immunoelectron microscopy**

660 Skin samples were dissected, fixed and stained according to the whole-mount  
661 immunostaining method. In-house rabbit EGFL6 antibody was used as the primary antibody  
662 and Alexa Fluor 488 FluoroNanogold-anti rabbit IgG (Nanoprobes) (1:200 dilution) was

663 used for the secondary antibody. After confirming the localization of Alexa Fluor 488  
664 labelled EGFL6 under a fluorescent microscope, the samples were fixed for 1 hr in 1%  
665 glutaraldehyde in PBS. GoldEnhance EM (Nanoprobes) was used in accordance with the  
666 manufacturer's protocol to enlarge the size of gold particles. Samples were then embedded  
667 in resin (poly/bed 812; Polyscience). Ultrathin sections were stained with uranyl acetate and  
668 lead citrate before observation with an electron microscope (JEM 1400 plus; JEOL).

669

### 670 **Quantification of axon and tSC processes**

671 Neural filaments and tSC protrusions were visualized, measured and analysed using  
672 the Imaris software program FilamentTracer (Bitplane). To detect A $\delta$ - and C-LTMRs and  
673 tSCs in *Egfl6* knockout mice, we crossed *Egfl6* knockout mice with *Ret-eGFP* knock-in  
674 mice (Jain et al., 2006) that express eGFP in C-LTMRs (Li et al., 2011). Skin whole-mounts  
675 were immunostained for TrkB, eGFP and nestin to visualize A $\delta$ - and C-LTMRs and tSCs,  
676 respectively. To examine the structure of lanceolate complexes, we analysed old bulge  
677 regions, but not new bulge regions, since the new bulge regions tend to show a small amount  
678 of EGFL6 and an irregular shape of lanceolate complexes. Axon endings and tSC processes  
679 were automatically detected in three dimensionally reconstructed immunohistochemical  
680 images using FilamentTracer. Traced axonal endings and tSC protrusions were visualized  
681 as fixed-diameter cylinders in green (*Ret-eGFP*), red (TrkB) and white (nestin). Length,  
682 number and width of axon endings and tSC processes were automatically measured by the  
683 software. Overlapped filament points were detected three-dimensionally using the cylinder  
684 display mode.

685 For the measurement of the upper-bulge perimeter, immunostained whole-mount z-  
686 stack images were reconstituted to 3D images with Imaris 7.2.1 software. An Imaris Oblique  
687 Slicer function was used to make a plane cutting through the region of tSC processes and

688 this plane was defined as a measurement layer. The perimeter of the hair follicle was traced  
689 and the length of the trace was automatically measured by the software.

690

### 691 **Quantification of the expressions of *Egfl6*-H2BeGFP and $\alpha v$ integrins**

692 GFP expression in *Egfl6*-H2BeGFP reporter mice were used to examine the expression of  
693 *Egfl6* transcripts. Adult telogen dorsal skin of *Egfl6*-H2BeGFP mice were immunostained  
694 for GFP, keratin 14 (marker for basal keratinocytes) and nestin (marker for tSCs), with  
695 DAPI nuclear counter staining, as described above. Vertical 3D images of zigzag hair  
696 follicles were obtained. The number of total and GFP-positive basal epidermal cells,  
697 terminal Schwann cells and other dermal cells at the upper-bulge were counted with  
698 reference to GFP, keratin-14, nestin and DAPI staining using Imaris software. Twenty-one  
699 zigzag hair follicles from three mice were used. The total number of cells counted were  
700 1,010 basal epidermal stem cells, 91 terminal Schwann cells and 319 other dermal cells.

701 To investigate the expression of *Egfl6* in sensory nerves of lanceolate complexes,  
702 we examined the GFP expression in the adult thoracic dorsal root ganglia (DRGs) of *Egfl6*-  
703 H2BeGFP mice since the nuclei of skin sensory nerves are located in the DRGs. DRGs were  
704 isolated and fixed with 4% PFA for 1 hr at 4°C. Whole DRG tissues were immunostained  
705 for  $\beta$ III tubulin (marker for DRG neurons) and GFP, with DAPI counter stain. Single  
706 sectional plane images were obtained as described above. Twenty-five DRGs from three  
707 mice were examined and 2,138 DRG neurons were quantified for their nuclear GFP  
708 expression.

709 To quantify the expression level of  $\alpha v$  integrins, we stained telogen adult dorsal skin  
710 of wild-type and *Egfl6* knockout mice for EGFL6,  $\alpha v$  integrin and nestin, with DAPI  
711 counter stain. Signal intensity of  $\alpha v$  integrins at the outer surface of the lanceolate

712 complexes was measured using Fiji ImageJ 1.0. Thirteen hair follicles from three wild-type  
713 mice and 16 hair follicles from three *Egfl6* knockout mice were used for quantification.

714

### 715 ***Ex vivo* skin–nerve preparations**

716 Receptive properties of cutaneous A $\delta$ -LTMRs were studied using mouse hindlimb skin–  
717 saphenous nerve preparations *ex vivo* (Zimmermann et al., 2009). Ten- to twelve-week-old  
718 male mice, which were in the resting hair growth phase, were euthanized by inhalation of  
719 CO<sub>2</sub> gas and the preparations were quickly isolated from the left hindlimb. The excised skin  
720 was oriented with the dermis side up in the test chamber and affixed with pins. The  
721 preparation was maintained at 32 ± 0.3°C (pH 7.4) during the experiment under superfusion  
722 with modified Krebs-Henseleit solution (Krebs solution), which contained 110.9 mM NaCl,  
723 4.7 mM KCl, 2.5 mM CaCl<sub>2</sub>, 1.2 mM MgSO<sub>4</sub>, 1.2 mM KH<sub>2</sub>PO<sub>4</sub>, 25 mM NaHCO<sub>3</sub> and 20  
724 mM glucose. The perfusate was continuously bubbled and equilibrated with a gas mixture  
725 of 95% O<sub>2</sub> and 5% CO<sub>2</sub>. The hindlimb skin of mouse is thinner than dorsal skin.

726

### 727 **Recordings of A $\delta$ -LTMRs**

728 Single A $\delta$ -LTMR was searched and identified when it fulfilled the following criteria: 1)  
729 fibers with conduction velocity between 2-10 m/s, 2) fibers responding well to innocuous  
730 touch stimulus applied by a blunt glass rod compared to noxious vertical indentation of the  
731 skin (compression), 3) fibers without mechanical stimulus intensity-dependent increase in  
732 the firing rate, 4) fibers exhibiting a brisk, rapidly adapting discharge at the onset of a  
733 supramaximal constant force stimulus (Koltzenburg, Stucky, & Lewin, 1997), 5) fibers not  
734 responding to noxious heat and cold stimuli (Figure 3–figure supplement 2) (Zimmermann  
735 et al., 2009), and 6) fibers showing a stronger excitation typically in the ramp phase of  
736 mechanical stimulation when the stimulus probe was horizontally moving compared to the

737 hold phase, as shown in Figure 3–figure supplement 2. The fibers identified by these criteria  
738 in wild type dermis-up skin-nerve preparation exhibited von Frey Hair threshold (vFH)  
739 values of  $\leq 0.51$ – $3.23$  mN (median: 1.3 mN, IQR: 0.8– $2.0$  mN) (Figure 3D), which fell into  
740 the range of previously reported vFH threshold values of A $\delta$ -LTMRs (or D-hair) with the  
741 same dermis-up method ( $< 1$ – $5.7$  mN), but not that of high-threshold A $\delta$ -mechano  
742 nociceptors ( $5.7$ – $128$  mN) (Zimmermann et al., 2009).

743 When an A $\delta$ -LTMR was identified, the receptive field (RF) was stimulated with  
744 electronic pulses via a bipolar stimulating electrode (frequency of 0.5 Hz, pulse duration of  
745  $100$   $\mu$ s and stimulus intensity of  $< 50$  V) to measure the conduction velocity of a fiber. The  
746 conduction velocity was calculated from the distance and conduction latency of a spike  
747 induced by electrical stimulation of the RF. Spontaneous activity of A $\delta$ -LTMRs was  
748 analysed for 20 s just before a series of touch mechanical stimulation. Distribution (size and  
749 location) of the RFs was mapped on a standardized chart. The size of the RF was measured  
750 by calculating the number of pixels in the RF that was drawn on a chart with Image J  
751 software. All of the data were stored in a computer via an A/D converter (Power Lab/16s,  
752 ADInstruments) with a sampling frequency of 20 kHz. Action potentials were analysed on  
753 a computer with the DAPSYS data acquisition system (<http://www.dapsys.net>).  
754 Quantitative mechanical, cold and heat stimuli were then applied to the identified RF in the  
755 following order: 1) ramp-and-hold touch mechanical stimulation, 2) cooled from  $32^{\circ}\text{C}$  to  
756  $8^{\circ}\text{C}$  and 3) heated from  $32^{\circ}\text{C}$  to  $50^{\circ}\text{C}$ .

757

### 758 **Mechanical stimulation**

759 At first, the mechanical sensitivity of A $\delta$ -LTMRs was semi-quantitatively analysed using a  
760 series of self-made von Frey hairs (VFHs:  $0.5$ – $17.6$  mN,  $0.5$  mm in diameter). The strength  
761 of the weakest filament that caused a mechanical response was taken as the threshold.

762 For quantitative analysis of the mechanical sensitivity of a fiber, a light touch  
763 stimulus was applied using a piezo-controlled micromanipulator (Nanomoter MM3A,  
764 Kleindiek Nanotechnik, Reutlingen, Germany). The stimulator had a glass probe with a  
765 spherical tip (diameter: 0.5 mm). After placing the probe tip to the most sensitive point on  
766 the identified RF, a series of ramp-and-hold touch mechanical stimuli were applied by  
767 driving the stimulator with a pre-programed computerized protocol. The tip was moved  
768 alternately in rostral and caudal directions with displacement in a progressively increasing  
769 manner (4–1280  $\mu\text{m}$ ) at a speed of 300  $\mu\text{m}/\text{s}$  (Figure 3–figure supplement 2A and C). The  
770 holding time was set for 2 s between the rostral and caudal movement of the probe tip.

771 Since all the A $\delta$ -LTMRs were spontaneously silent at the beginning of the  
772 experiment without any intentional stimuli, the mechanical response threshold was defined  
773 as the displacement that induced the first discharge during the stimulation protocol. If a fiber  
774 showed no action potentials during the course of the protocol, even though it exhibited firing  
775 as a result of manual touch with a blunt glass rod, then the mechanical threshold was defined  
776 to be 1,280  $\mu\text{m}$ . The magnitude of the touch response was represented by the number of  
777 spikes evoked during the rostral or caudal movement of the probe (i.e. ramp phases), but  
778 not during holding phases of 2 s without probe movement.

779

### 780 **Cold and Heat Stimulation**

781 We applied ramp-shaped thermal stimuli to the RF using a feedback-controlled Peltier  
782 device (intercross-2000N, Intercross, Co. Ltd., Japan) with a small probe (diameter: 1 mm).  
783 From a baseline temperature of 32°C, the RF was gradually cooled down to 8°C over 40 s  
784 or heated up to 50°C over 30 s at a constant rate of 0.6°C/s. Original temperature traces are  
785 shown in Figure 3–figure supplement 2B.

786



## 787 **Preparation of Extracellular Matrix Proteins**

788 FLAG-tagged mouse full-length EGFL6 was purified as described below. 293F cells were  
789 transfected with the *Egfl6-flag* expression vector and cultured for 4 days according to the  
790 manufacturer's instruction (Invitrogen). The supernatant was collected and incubated with  
791 anti-FLAG M2 affinity gel (Sigma) overnight at 4°C. The FLAG affinity gel was collected  
792 in an empty Econo-Column (Bio-Rad) and washed with PBS. Bound protein was eluted  
793 with 100 µg/ml FLAG peptide in PBS. The eluted protein solution was dialyzed with PBS.  
794 Protein concentration was measured with a Pierce BCA Protein Assay Kit using bovine  
795 serum albumin (BSA) as a control. The expression vector of RGE-mutant *Egfl6* was  
796 generated using the Toyobo KOD-Plus-Mutagenesis kit (Toyobo). FLAG-tagged mouse  
797 full-length nephronectin was purified as described previously (Fujiwara et al., 2011).  
798 Human plasma fibronectin (Wako) and laminin-511-E8 (Nippi) were purchased from the  
799 companies indicated.

800

## 801 **Solid-Phase Cell Adhesion Assays**

802 Solid-phase cell adhesion assays were performed as described previously (Fujiwara et al.,  
803 2011) with minor modifications. Briefly, 96-well cell culture plates were coated with  
804 purified ECM proteins and blocked with 1% heat-denatured BSA. Human primary and  
805 cultured cell lines were suspended in serum-free DMEM, plated on the coated plates, and  
806 incubated for 30 min in a CO<sub>2</sub> incubator at 37°C. Attached cells were fixed and stained with  
807 0.5% crystal violet in 20% methanol for 15 min. The cell-bound crystal violet was extracted  
808 with 1% SDS solution and the absorbance was measured at 595 nm. To inhibit cell adhesion  
809 activity of different integrins in cell adhesion assays, integrin function blocking antibodies  
810 were added to cell suspension before seeding to the coated wells. The cell suspension with  
811 the antibodies was incubated for 20 min and then plated on the coated dishes. The function-

812 blocking integrin antibodies used in this study were listed below: integrin  $\alpha$ 2 (P1E6),  $\alpha$ 3  
813 (P1B5),  $\alpha$ 5 (P1D6),  $\alpha$ 6 (GoH3),  $\alpha$ v (L230), and  $\beta$ 1 (P5D2). P1E6, P1B5, P1D6, and P5D2  
814 were purchased from the Developmental Studies Hybridoma Bank of the University of Iowa.  
815 GoH3 and L230 were purchased from BioLegend and ATCC, respectively. Cell lines used  
816 in the assays were human primary keratinocytes, HEK293, T98G, KG-1-C, SF-TY, NTI-4,  
817 HT-1080, K562 and K562-a8.

818

### 819 **Hair plucking assays**

820 Dorsal hairs of 20-day-old anaesthetised BALB/c mice were dyed using a neon orange hair  
821 colour cream for 30 min. Mice were maintained till the tip of new growing undyed hairs  
822 could be observed at the skin surface under a dissection microscope (P32-35). The dyed  
823 long club hairs, but not short emerging undyed new hairs, were plucked using tweezers  
824 under anaesthesia in an area of 10 x 15 mm. Three days after club hair plucking (P36-38),  
825 dorsal skin tissue samples containing both plucked and unplucked hair follicles were  
826 collected and subjected to whole-mount immunostaining. Plucked and unplucked skin areas  
827 could be easily distinguished by hair colour: the unplucked area showed dyed orange hair  
828 colour and the plucked area showed undyed white hair colour. In skin tissue samples, hair  
829 shafts could be identified by their autofluorescence. This allowed us to distinguish plucked  
830 and unplucked hair follicles within tissue samples under a confocal microscope. Zigzag hair  
831 follicles were selected for the analysis. Hair follicle types were distinguished by the  
832 following criteria under light-field illumination of 150  $\mu$ m-thick tissue sections. Zigzag hair  
833 follicles are the most abundant follicle type in adult mouse dorsal skin (~81%) (Driskell,  
834 Giangreco, Jensen, Mulder, & Watt, 2009). Growing new zigzag hairs in plucked and  
835 unplucked hair follicles have one row of medulla cells and the smallest diameter ( $9.58 \pm$   
836  $0.90 \mu$ m, n = 32 hair follicles) at the bulge region in comparison to other hair types. Awl

837 and auchene hair follicles together make up ~17% of the dorsal skin hair follicles. Growing  
838 awl/auchene hairs in plucked and unplucked hair follicles have more than three rows of  
839 medulla cells and have a large hair shaft diameter ( $15.7 \pm 1.95 \mu\text{m}$ ,  $n = 27$  hair follicles) at  
840 the bulge region. Guard hair follicles are rare (~1% of the adult dorsal skin hair follicles)  
841 and can be clearly identified by their prominent large follicle diameter.

842

#### 843 **Statistical analysis**

844 Statistical parameters including the numbers of samples and replicates, types of statistical  
845 analysis and statistical significance are indicated in the Results, Figures and Figure Legends.

846 p values: \* $p < 0.05$ ; \*\* $p < 0.01$ ; \*\*\* $p < 0.001$ .

847

#### 848 **Data availability**

849 Fastq files of RNA-seq data have been submitted to NCBI SRA, and these data can be  
850 accessed through the BioProject ID: PRJNA342736.

851

852

853 **Supplemental Figures and Tables**

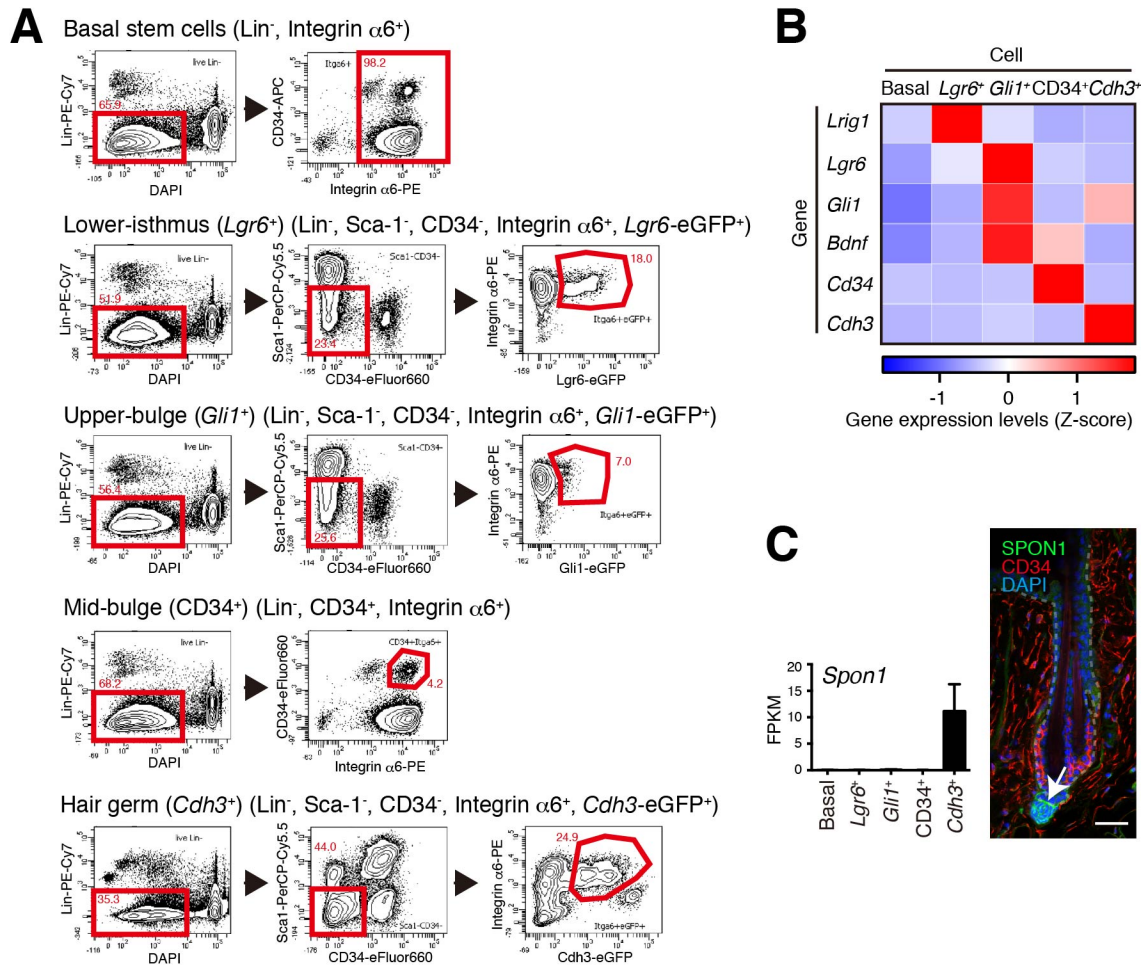

Figure 1–S1 Cheng *et al.*

854

855 **Figure 1–figure supplement 1. FACS-Based Cell Isolation Procedures for Distinct**

856 **Epidermal Stem Cell Populations (A)** FACS sorting procedures of all basal epidermal cell

857 populations using wild-type C57BL/6N mice, *Lgr6*<sup>+</sup> lower isthmus epidermal stem cells

858 using *Lgr6-GFP-ires-CreERT2* mice, *Gli1*<sup>+</sup> upper-bulge epidermal stem cells using *Gli1-*

859 *eGFP* mice, CD34<sup>+</sup> mid-bulge epidermal stem cells using wild-type C57BL/6N mice,

860 *Cdh3*<sup>+</sup> hair germ epidermal cells using *Cdh3-eGFP* mice. Gates are indicated by red-line

861 boxes and cells in the gates were further analysed in the next plots or sorted. The numbers

862 in the plots represent the percentage of cells in the gates. Lin<sup>-</sup> indicates lineage-negative

863 cells, which are negative for the markers of haematopoietic and endothelial cells (lineage-

864 positive cells). (B) Z-score heat map representing qRT-PCR analysis of sorted cells with  
865 compartment-specific gene primers. See Methods for more detail. Data are mean of 3-4  
866 independently isolated biological replicates. (C) Expression levels of *Spon1* gene in  
867 different stem cell pools. Immunostaining pattern of SPON1 protein in 8-week-old telogen  
868 dorsal hair follicle was shown. White arrow indicates the restricted localization of SPON1  
869 in dermal papilla and the basement membrane between dermal papilla and hair germ. This  
870 restricted expression and deposition of SPON1 corroborates little contamination of hair  
871 germ cells into the *Gli1*<sup>+</sup> upper-bulge population. FPKM, fragments per kilobase of  
872 transcript per million mapped reads. Basal, basal epidermal stem cell pool. Data are mean  
873  $\pm$  SD, n = 3-4. Scale bar, 10  $\mu$ m.  
874

875

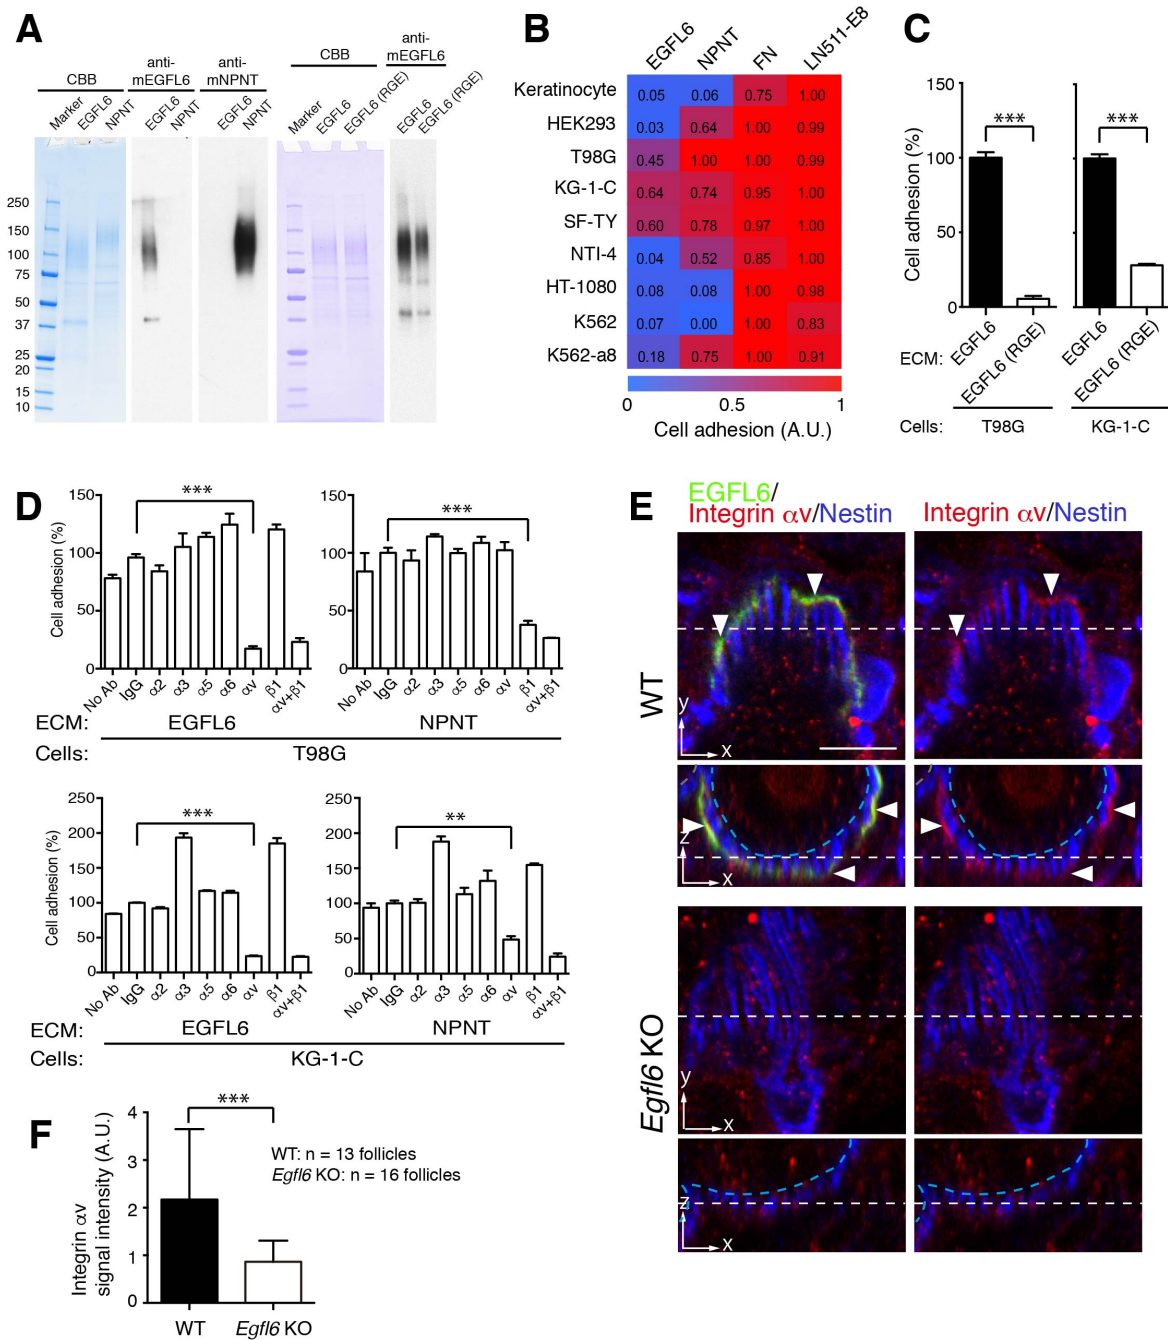

Figure 2–S2 Cheng *et al.*

876

877 **Figure 2–figure supplement 1. Cell Adhesion to EGFL6 is Mediated by  $\alpha$ V Integrins.**

878 (A) Coomassie Brilliant Blue (CBB) staining and western blotting of purified EGFL6, RGE-

879 mutant EGFL6, and nephronectin (NPNT) are shown. (B) Heat map display of the results

880 of cell adhesion assays. The number of adhered cells was converted to arbitrary units (A.U.).

881 FN, fibronectin; LN511-E8, laminin-511 E8 fragment. n = 3. Cell lines used are human

882 primary keratinocytes, human embryonic kidney epithelial cell line HEK293, human  
883 glioblastoma cell line T98G, Human glioma cell line KG-1-C, human skin fibroblast cell  
884 line SF-TY, human embryonic fibroblast cell line NTI-4, human sarcoma cell line HT-1080,  
885 human myelogenous leukemia cell line K562 and K562 transfected with human integrin  $\alpha 8$   
886 cDNA K562-a8. (C) Cell adhesion assays with T98G and KG-1-C cells plated on EGFL6  
887 or RGE-mutant EGFL6-coated dishes. Data are mean  $\pm$  SEM, n = 3. (D) Cell adhesion  
888 inhibition assays with integrin antibodies. Data are mean  $\pm$  SEM, n = 3. (E) 8-week-old  
889 telogen dorsal HFs of wild-type and *Egfl6* knockout mice were stained for EGFL6, integrin  
890  $\alpha v$  and nestin. Scale bar, 10  $\mu$ m. Blue dashed lines indicate the surface of follicle epidermis  
891 and white dashed lines indicate cross-section positions. (F) Quantification of  $\alpha v$  integrin  
892 signal intensity in lanceolate complexes. Data are mean  $\pm$  SD. Statistics (C, D, F): two-  
893 tailed unpaired *t*-test.

894

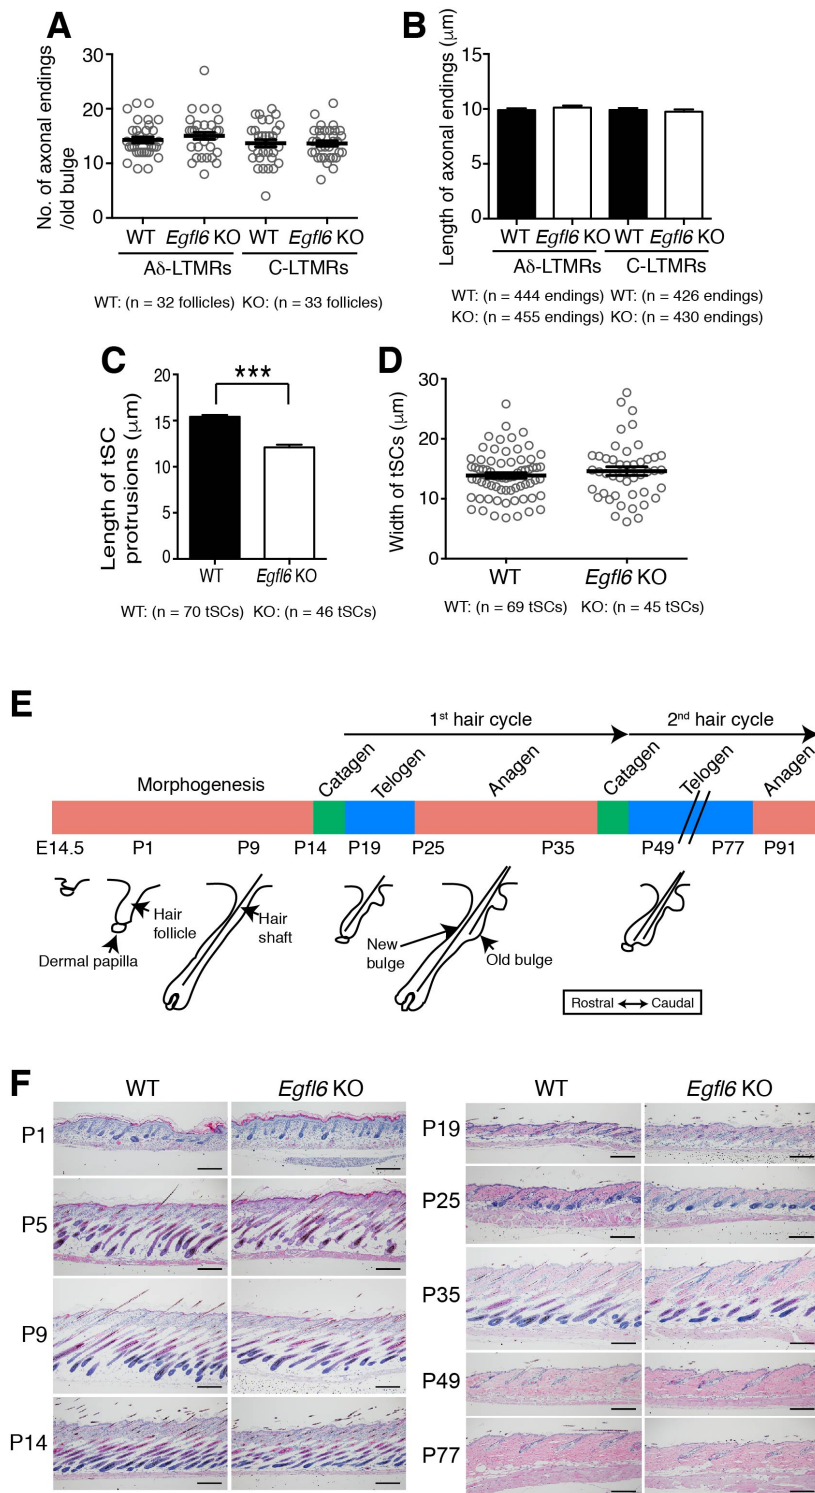

Figure 3–S1 Cheng *et al.*

895

896 **Figure 3–figure supplement 1. Quantification of Morphological Characteristics of**

897 **Axonal Endings and tSC Processes and Histological Examination of Skin Tissue**

898 **Morphology in Wild-type and *Eglf6* Knockout Mice (A) Number of axonal endings in**

899 **the old bulge of zigzag hair follicles was counted. Data are mean  $\pm$  SEM, n = 32 hair follicles**



900 for wild-type and n = 33 hair follicles for knockout from 3 mice each. (B) Length of axonal  
901 endings in the old bulge of zigzag hair follicles was measured. Data are mean  $\pm$  SEM, n =  
902 444 axonal endings for wild-type and n = 455 axonal endings for knockout from 3 mice  
903 each. (C) Length and width of tSC processes were measured. Data are mean  $\pm$  SEM, n = 70  
904 tSCs for wild-type and n = 46 tSCs for knockout from 3 mice each. (D) Width of tSC  
905 processes were measured. Data are mean  $\pm$  SEM, n = 69 tSCs for wild-type and n = 45 tSCs  
906 for knockout from 3 mice each. (E) Schematic representation of mouse hair follicle  
907 morphogenesis and the following regeneration cycles. During the first anagen phase (P25-  
908 P35), old and new hair bulge structures form. (F) H&E-stained dorsal skin of wild-type and  
909 *Egfl6* knockout mice. Scale bars, 100  $\mu$ m.

910

911

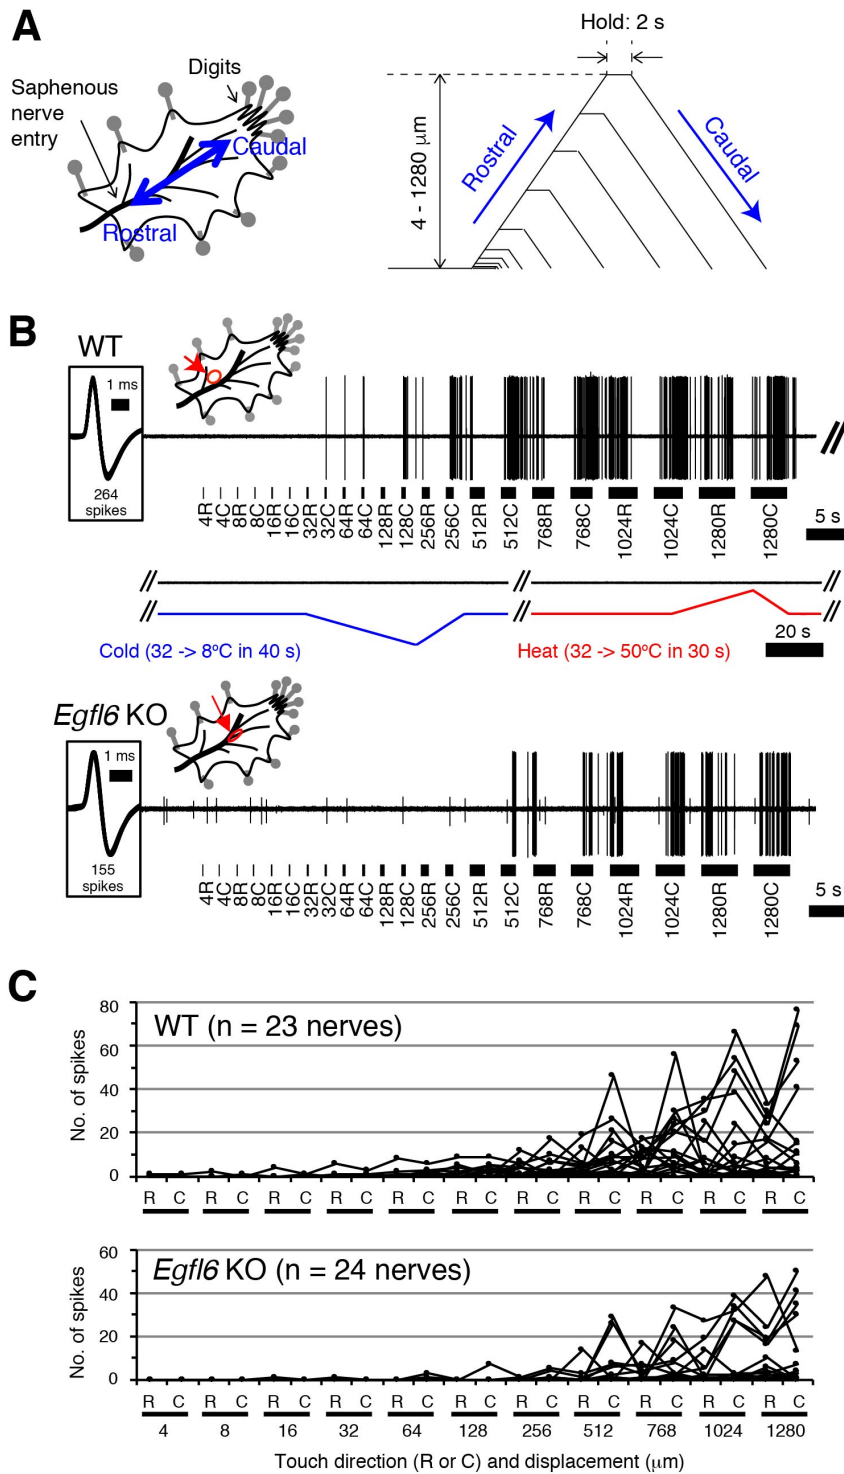

Figure3–S2 Cheng *et al.*

912

913 **Figure 3–figure supplement 2. Skin–Nerve Preparation and Recordings of Responses**

914 **of A $\delta$ -LTMRs** (A) Mouse skin–nerve preparation *ex vivo*, which is oriented with the dermis

915 side up in the test chamber and affixed with pins. A ramp-and-hold touch stimulus protocol

916 is shown. A probe tip was moved alternately in rostral and caudal directions with

917 displacement in a progressively increasing manner (4–1280  $\mu\text{m}$ ) at a speed of 300  $\mu\text{m/s}$ .  
918 The holding time was set for 2 s between the rostral and caudal movement of the tip. (B)  
919 Representative responses in the wild-type (upper panel) and *Egfl6* knockout skin (lower  
920 panel). Note the first spike of the wild-type in response to touch stimulus with caudal  
921 displacement of 32  $\mu\text{m}$  (i.e. 32C). No firings were observed in response to cold (from 32°C  
922 to 8°C in 40 s) or heat (from 32°C to 50°C in 30 s) stimulations. In the knockout, smaller  
923 responses to touch stimuli can be observed with the higher threshold displacement of 512  
924  $\mu\text{m}$ . Spike shapes are shown in insets squared at the left side. All of the spikes generated  
925 during a series of stimuli are superimposed (264 spikes in wild-type, and 155 spikes in  
926 knockout). The distribution of receptive fields is indicated by an arrow. (C) Individual  
927 response patterns in the wild-type (n = 23, upper panel) and the knockout (n = 24, lower  
928 panel).  
929  
930

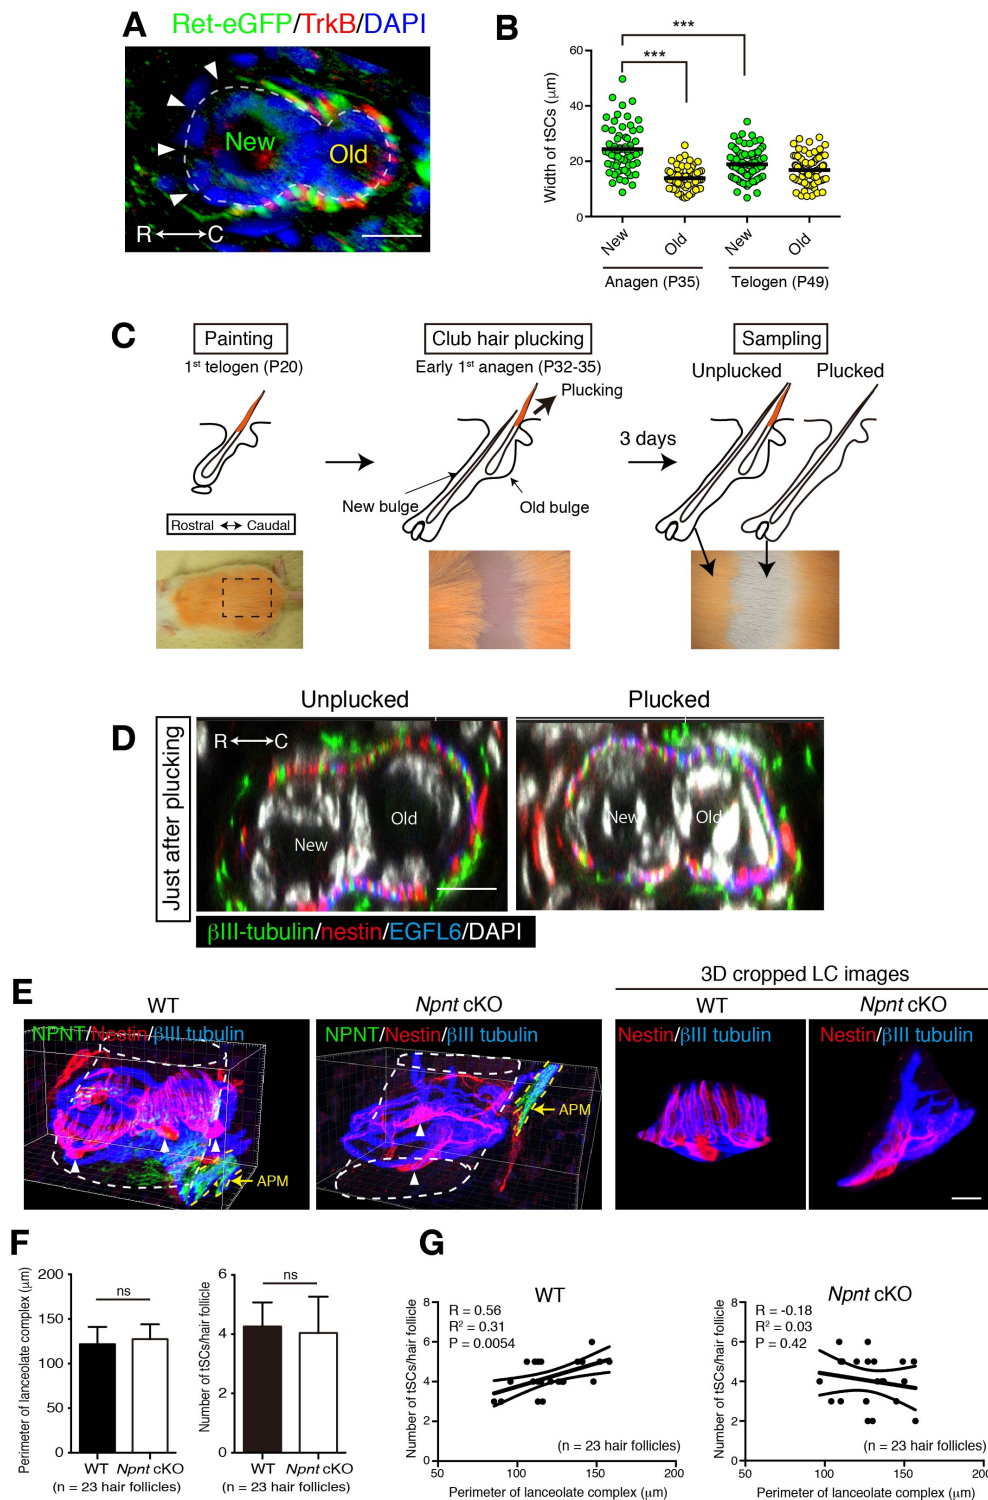

Figure 4–S1 Cheng *et al.*

931

932 **Figure 4–figure supplement 1. The old bulge formation provides stable epidermal-**

933 **neuronal interfaces (A)** A cross-sectional view of 7-week-old telogen upper bulge stained

934 for Ret-eGFP, TrkB and DAPI. Closed arrowheads indicate a gap of lanceolate endings. (B)

935 The width of tSCs in new and old bulges in the first anagen (P35) and second telogen (P49)

936 follicles were quantified.  $n = 60\text{--}92$  tSCs from 3 mice. Individual measurement data are  
937 shown as circles. Mean  $\pm$  SEM are shown as bars,  $n = 3$  mice. Statistical comparisons were  
938 performed using two-tailed unpaired  $t$ -test. (C) Procedure of club hair plucking experiments.  
939 (D) Transverse sectional views of upper-bulge with club-hair unplucked and plucked P32  
940 early anagen hair follicles stained for  $\beta$ III-tubulin, nestin, EGFL6 and DAPI. Just after  
941 plucking, little structural damage to the old bulge epidermis and LCs were observed. (E) 3D  
942 reconstituted immunostaining images of upper-bulge region of 7-week-old telogen  
943 Awl/auchene hair follicles of wild-type and epidermis-specific conditional nephronectin  
944 (*Npnt*) knockout mice (Keratin5-Cre/*Npnt* fl/fl). Upon epidermal deletion of *Npnt* gene,  
945 arrector pili muscles (APM) moved above the bulge (Fujiwara et al., 2011), where LCs were  
946 located. Arrowheads indicate the nuclei of tSCs. In the mutant, some hair follicles showed  
947 disrupted patterning of longitudinal sensory nerve endings and tSCs processes. This mutant  
948 image shows a significantly fewer number of longitudinal lanceolate endings and tSC  
949 processes (see also 3D cropped LC images). (F) The perimeter and number of LCs in  
950 randomly selected non-guard hair follicles of wild-type and *Npnt* conditional knockout mice  
951 were measured. No statistically significant difference was observed. Data are mean  $\pm$  SD,  $n$   
952 = 23 hair follicles from wild-type and mutant mice, respectively. (G) The number of tSCs  
953 were plotted against the perimeter of LCs. In the wild-type, the number of tSCs correlated  
954 well with the perimeter of LCs, *i.e.* perimeter of hair follicles, while in the *Npnt* knockout  
955 mice, distribution of the values of “number of tSC/perimeter of LCs” was scattered and their  
956 correlation was lost (see  $R^2$  and  $p$ -value), indicating the anatomical changes of LCs in *Npnt*  
957 mutants.  $n = 23$  hair follicles from wild-type and mutant mice, respectively. Scale bars, 10  
958  $\mu\text{m}$ .  
959  
960

961 **Figure 1– table supplement 1. Normalized Enrichment Score (NES) of Gene Set**  
 962 **Enrichment Analysis (GSEA)**

| <b>Cdh3</b> | <b>CD34</b> | <b>Lgr6</b> | <b>Gli1</b> | <b>GO terms</b>                                                                                      |
|-------------|-------------|-------------|-------------|------------------------------------------------------------------------------------------------------|
| 1.674       | 0.916       | -0.868      | 1.210       | NEGATIVE_REGULATION_OF_TRANS<br>CRIPTION_DNA_DEPENDENT                                               |
| 1.662       | 0.899       | -0.859      | 1.204       | REGULATION_OF_TRANSCRIPTION_F<br>ROM_RNA_POLYMERASE_II_PROMO<br>TER                                  |
| 1.655       | 0.930       | -0.808      | 1.201       | POSITIVE_REGULATION_OF_NUCLEO<br>BASENUCLEOSIDENUCLEOTIDE_AN<br>D_NUCLEIC_ACID_METABOLIC_PRO<br>CESS |
| 1.639       | 0.907       | -0.863      | 1.186       | NEGATIVE_REGULATION_OF_RNA_<br>METABOLIC_PROCESS                                                     |
| 1.571       | 0.981       | -0.898      | 1.228       | NEGATIVE_REGULATION_OF_NUCLE<br>OBASENUCLEOSIDENUCLEOTIDE_A<br>ND_NUCLEIC_ACID_METABOLIC_PR<br>OCESS |
| 1.591       | 0.989       | -0.862      | 1.167       | POSITIVE_REGULATION_OF_TRANSC<br>RIPTION                                                             |
| 1.561       | 0.928       | -0.817      | 1.148       | POSITIVE_REGULATION_OF_RNA_M<br>ETABOLIC_PROCESS                                                     |
| 1.552       | 0.928       | -0.823      | 1.145       | POSITIVE_REGULATION_OF_TRANSC<br>RIPTIONDNA_DEPENDENT                                                |
| 1.492       | 0.990       | -0.850      | 1.252       | NEGATIVE_REGULATION_OF_META<br>BOLIC_PROCESS                                                         |
| 1.474       | 1.000       | -0.854      | 1.249       | NEGATIVE_REGULATION_OF_CELLU<br>LAR_METABOLIC_PROCESS                                                |
| 1.507       | 0.921       | 0.860       | 1.260       | NEGATIVE_REGULATION_OF_TRANS<br>CRIPTION_FROM_RNA_POLYMERASE<br>II_PROMOTER                          |
| 1.508       | 1.006       | 0.897       | 1.099       | TRANSMEMBRANE_RECEPTOR_PROT<br>EIN_TYROSINE_KINASE_SIGNALING_<br>PATHWAY                             |
| 1.688       | -0.999      | -0.902      | 1.191       | REGULATION_OF_RNA_METABOLIC_<br>PROCESS                                                              |
| 1.652       | -0.988      | -0.896      | 1.187       | REGULATION_OF_TRANSCRIPTIOND<br>NA_DEPENDENT                                                         |
| 1.666       | -0.918      | -0.864      | 1.253       | REGULATION_OF_TRANSCRIPTION                                                                          |
| 1.616       | -0.969      | -0.914      | 1.192       | REGULATION_OF_NUCLEOBASENUC<br>LEOSIDENUCLEOTIDE_AND_NUCLEI<br>C_ACID_METABOLIC_PROCESS              |
| 1.510       | -0.938      | -0.885      | 1.134       | POSITIVE_REGULATION_OF_METAB<br>OLIC_PROCESS                                                         |
| 1.496       | -0.939      | -0.911      | 1.122       | POSITIVE_REGULATION_OF_CELLUL<br>AR_METABOLIC_PROCESS                                                |
| 1.503       | -1.349      | -1.005      | 1.305       | MULTI_ORGANISM_PROCESS                                                                               |

|       |        |        |       |                                                                          |
|-------|--------|--------|-------|--------------------------------------------------------------------------|
| 1.568 | -0.953 | 0.965  | 1.224 | TRANSCRIPTION_FROM_RNA_POLYMERASE_II_PROMOTER                            |
| 1.537 | -1.115 | 0.972  | 1.195 | PROTEIN_KINASE_CASCADE                                                   |
| 1.604 | -0.901 | 0.988  | 1.234 | PROTEIN_AMINO_ACID_PHOSPHORYLATION                                       |
| 1.551 | -1.108 | 1.041  | 1.316 | REGULATION_OF_MAP_KINASE_ACTIVITY                                        |
| 1.665 | -0.999 | 1.095  | 1.032 | FEEDING_BEHAVIOR                                                         |
| 1.629 | -0.837 | 1.165  | 1.424 | MAPKKK_CASCADE                                                           |
| 1.473 | -1.314 | 1.197  | 1.330 | RESPONSE_TO_BIOTIC_STIMULUS                                              |
| 1.818 | 1.208  | -0.932 | 1.375 | MUSCLE_DEVELOPMENT                                                       |
| 1.715 | 1.316  | -1.093 | 1.341 | ENZYME_LINKED_RECEPTOR_PROTEIN_SIGNALING_PATHWAY                         |
| 1.544 | 1.286  | -1.377 | 1.332 | TRANSMEMBRANE_RECEPTOR_PROTEIN_SERINE_THREONINE_KINASE_SIGNALING_PATHWAY |
| 1.700 | 1.052  | 0.824  | 1.335 | NEGATIVE_REGULATION_OF_TRANSCRIPTION                                     |
| 1.624 | 1.093  | 0.835  | 1.186 | POSITIVE_REGULATION_OF_TRANSCRIPTION_FROM_RNA_POLYMERASE_II_PROMOTER     |
| 1.623 | 1.231  | -1.321 | 1.039 | FEMALE_PREGNANCY                                                         |
| 1.390 | -1.241 | -0.947 | 0.995 | REGULATION_OF_KINASE_ACTIVITY                                            |
| 1.385 | -1.198 | -1.146 | 0.998 | G_PROTEIN_COUPLED_RECEPTOR_PROTEIN_SIGNALING_PATHWAY                     |
| 1.379 | -1.250 | -0.898 | 0.994 | REGULATION_OF_TRANSFERASE_ACTIVITY                                       |
| 1.338 | -1.188 | -0.889 | 1.047 | REGULATION_OF_MOLECULAR_FUNCTION                                         |
| 1.449 | -1.128 | -0.957 | 1.055 | REGULATION_OF_SIGNAL_TRANSDUCTION                                        |
| 1.446 | -1.213 | -0.911 | 1.033 | REGULATION_OF_PROTEIN_KINASE_ACTIVITY                                    |
| 1.301 | -1.199 | -0.998 | 1.278 | CELL_PROLIFERATION                                                       |
| 1.466 | -1.023 | 1.053  | 1.219 | PHOSPHORYLATION                                                          |
| 1.417 | -1.100 | 0.979  | 1.203 | POST_TRANSLATIONAL_PROTEIN_MODIFICATION                                  |
| 1.425 | -0.968 | 1.021  | 1.091 | SECOND_MESSENGER_MEDIATED_SIGNALING                                      |
| 1.275 | -1.170 | 1.081  | 1.087 | REGULATION_OF_DEVELOPMENTAL_PROCESS                                      |
| 1.523 | -1.081 | -1.118 | 0.774 | NUCLEOCYTOPLASMIC_TRANSPORT                                              |
| 1.516 | -1.095 | -1.097 | 0.759 | NUCLEAR_TRANSPORT                                                        |
| 1.555 | -1.082 | -1.215 | 0.785 | NUCLEAR_IMPORT                                                           |
| 1.629 | -1.056 | -1.234 | 0.804 | PROTEIN_IMPORT_INTO_NUCLEUS                                              |
| 1.618 | -1.180 | 0.850  | 0.915 | B_CELL_ACTIVATION                                                        |
| 1.514 | 0.913  | -0.943 | 0.933 | STRIATED_MUSCLE_DEVELOPMENT                                              |
| 1.213 | -1.495 | 1.241  | 1.433 | RESPONSE_TO_WOUNDING                                                     |

|        |        |       |       |                                                                   |
|--------|--------|-------|-------|-------------------------------------------------------------------|
| 1.303  | -1.510 | 1.144 | 1.365 | RESPONSE_TO_EXTERNAL_STIMULUS                                     |
| 1.304  | -1.822 | 1.296 | 1.300 | DEFENSE_RESPONSE                                                  |
| 1.384  | -1.278 | 1.255 | 1.621 | DETECTION_OF_EXTERNAL_STIMULUS                                    |
| 1.211  | -1.096 | 1.146 | 1.599 | GROWTH                                                            |
| 1.139  | -1.151 | 0.978 | 1.487 | CATION_HOMEOSTASIS                                                |
| 1.205  | 1.116  | 1.222 | 1.631 | NEURON_DIFFERENTIATION                                            |
| 1.152  | 1.097  | 1.242 | 1.577 | NEURON_DEVELOPMENT                                                |
| 1.159  | 1.075  | 1.114 | 1.537 | GENERATION_OF_NEURONS                                             |
| 1.023  | 1.012  | 1.089 | 1.520 | NEUROGENESIS                                                      |
| 1.233  | 1.168  | 0.943 | 1.375 | NERVOUS_SYSTEM_DEVELOPMENT                                        |
| 1.605  | 1.198  | 1.168 | 1.634 | GLUTAMATE_SIGNALING_PATHWAY                                       |
| 1.461  | 1.090  | 1.112 | 1.654 | BRAIN_DEVELOPMENT                                                 |
| 1.450  | 1.273  | 0.969 | 1.585 | ORGAN_MORPHOGENESIS                                               |
| 1.603  | 1.140  | 1.287 | 1.360 | CYCLIC_NUCLEOTIDE_MEDIATED_SIGNALING                              |
| 1.487  | 1.102  | 1.180 | 1.412 | CELL_CELL_SIGNALING                                               |
| 1.624  | 1.024  | 1.160 | 1.300 | G_PROTEIN_SIGNALING_COUPLED_TO_CYCLIC_NUCLEOTIDE_SECOND_MESSENGER |
| 1.162  | -0.900 | 1.621 | 1.517 | SODIUM_ION_TRANSPORT                                              |
| 1.081  | -1.806 | 1.593 | 1.514 | DEFENSE_RESPONSE_TO_BACTERIUM                                     |
| 1.261  | -1.316 | 1.669 | 1.552 | METAL_ION_TRANSPORT                                               |
| 1.251  | -1.175 | 1.430 | 1.604 | TISSUE_DEVELOPMENT                                                |
| 1.083  | 1.052  | 1.476 | 1.761 | DEVELOPMENTAL_MATURATION                                          |
| 1.055  | 1.061  | 1.603 | 1.492 | MONOVALENT_INORGANIC_CATION_TRANSPORT                             |
| 1.022  | -1.147 | 1.529 | 1.558 | ECTODERM_DEVELOPMENT                                              |
| 0.957  | -1.205 | 1.505 | 1.554 | EPIDERMIS_DEVELOPMENT                                             |
| -0.800 | -1.495 | 1.683 | 1.511 | KERATINOCYTE_DIFFERENTIATION                                      |
| -0.693 | -0.899 | 1.608 | 1.414 | REGULATION_OF_DEFENSE_RESPONSE                                    |
| -1.175 | -0.977 | 1.651 | 1.799 | SYNAPTOGENESIS                                                    |
| -1.526 | -1.289 | 1.591 | 1.748 | SYNAPSE_ORGANIZATION_AND_BIOGENESIS                               |
| -0.849 | 0.874  | 1.491 | 1.286 | ALCOHOL_METABOLIC_PROCESS                                         |
| -1.015 | -1.208 | 1.454 | 1.344 | CATION_TRANSPORT                                                  |
| -1.170 | -1.286 | 1.437 | 1.190 | LIPID_METABOLIC_PROCESS                                           |
| -1.047 | -1.143 | 1.345 | 1.164 | CELLULAR_LIPID_METABOLIC_PROCESS                                  |
| -0.947 | -1.732 | 1.647 | 1.132 | INNATE_IMMUNE_RESPONSE                                            |
| 1.501  | 1.102  | 1.530 | 1.662 | EXCRETION                                                         |
| 1.521  | -1.415 | 1.419 | 1.633 | DETECTION_OF_STIMULUS                                             |
| 1.663  | -1.418 | 1.902 | 1.663 | CALCIUM_INDEPENDENT_CELL_CELL_ADHESION                            |
| 1.497  | 1.355  | 1.321 | 1.673 | CELL_MATURATION                                                   |



|       |       |        |       |                                                        |
|-------|-------|--------|-------|--------------------------------------------------------|
| 1.465 | 1.344 | 1.219  | 1.599 | ANATOMICAL_STRUCTURE_MORPHOGENESIS                     |
| 1.711 | 1.409 | 1.291  | 1.590 | PATTERN_SPECIFICATION_PROCESS                          |
| 1.388 | 1.539 | 1.376  | 1.665 | POTASSIUM_ION_TRANSPORT                                |
| 1.609 | 1.805 | 1.517  | 1.718 | AXON_GUIDANCE                                          |
| 1.899 | 1.849 | -0.724 | 1.802 | DETECTION_OF_ABIOTIC_STIMULUS                          |
| 1.870 | 1.802 | -0.720 | 1.725 | DETECTION_OF_STIMULUS_INVOLVED_IN_SENSORY_PERCEPTION   |
| 1.576 | 1.753 | -0.730 | 1.556 | HORMONE_SECRETION                                      |
| 1.695 | 1.504 | -1.197 | 1.495 | SKELETAL_DEVELOPMENT                                   |
| 1.867 | 1.718 | 1.092  | 1.274 | MESODERM_DEVELOPMENT                                   |
| 0.875 | 1.736 | 0.825  | 1.504 | REGULATION_OF_HEART_CONTRACTION                        |
| 0.909 | 1.959 | -1.410 | 1.177 | GENERATION_OF_A_SIGNAL_INVOLVED_IN_CELL_CELL_SIGNALING |

963

964

965 **Figure 2–table supplement 1. List of ECM proteins screened for upper-bulge**

966 **localization with immunohistochemical analysis**

| Gene symbol | Protein name (Abbreviation)                                         | Antibody ID | Manufacturer            | Upper-bulge localization | Tissue localization                                                |
|-------------|---------------------------------------------------------------------|-------------|-------------------------|--------------------------|--------------------------------------------------------------------|
| Aspn        | Asporin                                                             | ab58741     | abcam                   | Yes                      | Upper bulge sensory neuron                                         |
| Crispld1    | Cysteine-rich secretory protein LCCL domain containing 1 (CRISPLD1) | ab123039    | abcam                   | Yes                      | Basement membrane zone of upper-bulge                              |
| Epdr1       | Ependymin related protein 1 (EPDR1)                                 | PA283664    | Cusabio                 | No                       | Uncertain                                                          |
| Col5a2      | Collagen, type V, alpha 2 (COL5A2)                                  | ab7046      | abcam                   | Yes                      | Broadly distributed in the epidermal-dermal basement membrane zone |
| Vwa2        | von Willebrand factor A domain-containing protein 2 (VWA2)          | ab111164    | abcam                   | No                       | Follicle-arrector pili muscle junction                             |
| Fam101b     | Refilin B                                                           | orb183474   | biorbyt                 | No                       | Uncertain                                                          |
| Ltbp1       | Latent TGF-beta-binding protein 1 (LTBP1)                           | PA807018    | Cusabio                 | No                       | Uncertain                                                          |
| Postn       | Periostin                                                           | ab14041     | abcam                   | Yes                      | Basement membrane zone of upper-and mid-bulge                      |
| Spon2       | Spondin-2                                                           | PA006509    | Cusabio                 | No                       | Uncertain                                                          |
| Egfl6       | Epidermal growth factor-like protein 6 (EGFL6)                      | CUK1203     | Fujiwara lab (in house) | Yes                      | Upper-bulge collar matrix                                          |
| Igfbp5      | Insulin-like growth factor binding protein 5 (IGFBP5)               | AF578       | R&D                     | Yes                      | Upper bulge sensory neuron                                         |
| Col8a2      | Collagen, type VIII, alpha 2 (COL8A2)                               | 34099       | USBiological            | No                       | Uncertain                                                          |
| Igfbp7      | Insulin-like growth factor binding protein 7 (IGFBP7)               | ab129302    | abcam                   | No                       | Uncertain                                                          |
| Adamtsl4    | ADAMTS-like 4 (ADAMTSL4)                                            |             |                         | Not tested               |                                                                    |
| Col4a3      | Collagen, type IV, alpha 3 (COL4A3)                                 | H31         | Shigei Med. Res. Inst.  | Yes                      | Basement membrane zone of upper-bulge                              |
| Col4a4      | Collagen, type IV, alpha 4 (COL4A4)                                 | RH42        | Shigei Med. Res. Inst.  | Yes                      | Basement membrane zone of upper-bulge                              |

967  
968  
969

970 **Figure 3–table supplement 1. General characteristics of A $\delta$ -LTMRs**

| Outcomes                                | WT<br>(n=23 nerves) | <i>Egfl6</i> KO<br>(n=24 nerves) | <i>p</i> value   |
|-----------------------------------------|---------------------|----------------------------------|------------------|
| Activation threshold (V)                | 3.0 (2.0-4.0)       | 3.0 (2.0-6.0)                    | <i>p</i> = 0.778 |
| Conduction velocity (m/s)               | 6.6 (5.1-7.7)       | 7.7 (5.0-8.6)                    | <i>p</i> = 0.115 |
| Spontaneous activity (imp/s)            | 0 (0-0)             | 0 (0-0)                          | <i>p</i> > 0.999 |
| Receptive field size (mm <sup>2</sup> ) | 6.5 (4.7-13.2)      | 4.8 (2.8-7.3)                    | <i>p</i> = 0.059 |

971

972

973 **Table 1. Antibodies used in this study**

| ANTIBODY                        | SOURCE       | IDENTIFIER       |
|---------------------------------|--------------|------------------|
| Rabbit anti-mouse EGFL6         | Fujiwara Lab | This paper       |
| Rabbit anti-mouse nephrinectin  | Fujiwara Lab | This paper       |
| Mouse anti-keratin 14           | abcam        | LL002 (ab77684)  |
| Mouse anti-keratin 15           | Santa Cruz   | LHK15 (sc-47697) |
| Mouse anti- $\beta$ III-tubulin | abcam        | 2G10 (ab78078)   |
| Chicken anti-nestin             | Aves Labs    | NES0407          |
| Rat anti-nestin                 | Millipore    | rat-401 (MAB353) |
| Chicken anti-GFP                | abcam        | ab13970          |
| Rabbit anti-GFP                 | MBL          | 598              |
| Mouse anti-laminin $\gamma$ 1   | Millipore    | MAB1914          |
| Rat anti-integrin $\alpha$ v    | abcam        | RMV-7            |
| Goat anti-TrkB                  | R&D Systems  | AF1494           |
| Rat anti-CD45-PE-Cy7            | eBioscience  | 30-F11           |
| Rat anti-TER-119-PE-Cy7         | eBioscience  | TER119           |
| Rat anti-CD31-PE-Cy7            | eBioscience  | 390              |
| Rat anti-Sca-1-PerCP-Cy5.5      | eBioscience  | D7               |
| Rat anti-CD34-eFluor660         | eBioscience  | RAM34            |
| Rat anti-CD49f-PE               | eBioscience  | GoH3             |
| Mouse anti-integrin $\alpha$ 2  | DSHB         | P1E6             |
| Mouse anti-integrin $\alpha$ 3  | DSHB         | P1B5             |
| Mouse anti-integrin $\alpha$ 5  | DSHB         | P1D6             |
| Rat anti-integrin $\alpha$ 6    | BioLegend    | GoH3 (313614)    |
| Mouse anti-integrin $\alpha$ v  | ATCC         | L230             |
| Mouse anti-integrin $\beta$ 1   | DSHB         | P5D2             |

974

975

976

977 **Table 2. Primer sequences for qRT-PCR**

| <b>Target genes</b>    | <b>Primer sequences</b>  |
|------------------------|--------------------------|
| <i>Gapdh</i> (Forward) | TGCCAGCCTCGTCCCGTAG      |
| <i>Gapdh</i> (Reverse) | CGGCCTTGACTGTGCCGTTG     |
| <i>Lrig1</i> (Forward) | TGTGTGTCTGAGAGACCCGAGC   |
| <i>Lrig1</i> (Reverse) | CAGAGCCACTGTGTGCTGTTGT   |
| <i>Lgr6</i> (Forward)  | GGCTCCGAATCCTGGAGCTGT    |
| <i>Lgr6</i> (Reverse)  | CTCAGGGTGGATGGCACGGA     |
| <i>Gli1</i> (Forward)  | ATCTCCGGGCGGTTCCCTACG    |
| <i>Gli1</i> (Reverse)  | TGACTTCAGCTGGCAGGTTGC    |
| <i>Bdnf</i> (Forward)  | GCGGCGCCCATGAAAGAAGT     |
| <i>Bdnf</i> (Reverse)  | GGCCGAACCTTCTGGTCCTCA    |
| <i>Cd34</i> (Forward)  | TGGCGCTGGGTAGCTCTCTG     |
| <i>Cd34</i> (Reverse)  | TAGTCTCTGAGATGGCTGGTGTGG |
| <i>Cdh3</i> (Forward)  | TGGGGAAAGTAGCCTTGGCTGG   |
| <i>Cdh3</i> (Reverse)  | CAGCCTCTGAGGGAAGGGACC    |

978

979

980 **Table 3. RNA-seq read counts and mapping statistics**

|                                   | <b>Raw Read Count</b> | <b>Trimmed Read Count</b> | <b>rDNA Read Count</b> | <b>Multi-Mapped Read Count</b> | <b>Uniquely Mapped Read Count</b> |
|-----------------------------------|-----------------------|---------------------------|------------------------|--------------------------------|-----------------------------------|
| <b>Mouse_Basal_Cells_Rep1</b>     | 11,757,494            | 11,278,061                | 148,700                | 170,077                        | 10,456,332                        |
| <b>Mouse_Basal_Cells_Rep2</b>     | 11,245,045            | 10,668,752                | 73,729                 | 134,777                        | 10,051,376                        |
| <b>Mouse_Basal_Cells_Rep3</b>     | 11,313,239            | 10,747,103                | 108,596                | 146,602                        | 10,089,518                        |
| <b>Mouse_Bulge_StemCells_Rep1</b> | 11,735,034            | 11,181,377                | 64,614                 | 183,557                        | 10,520,864                        |
| <b>Mouse_Bulge_StemCells_Rep2</b> | 11,917,049            | 11,515,851                | 54,154                 | 175,176                        | 10,889,932                        |
| <b>Mouse_Bulge_StemCells_Rep3</b> | 13,417,100            | 12,895,113                | 88,655                 | 218,495                        | 12,090,872                        |
| <b>Mouse_Cdh3+_Cells_Rep1</b>     | 10,875,593            | 10,409,342                | 68,193                 | 177,407                        | 9,574,901                         |
| <b>Mouse_Cdh3+_Cells_Rep2</b>     | 11,565,616            | 10,993,093                | 65,001                 | 185,981                        | 10,079,620                        |
| <b>Mouse_Cdh3+_Cells_Rep3</b>     | 11,405,265            | 10,746,768                | 76,143                 | 206,384                        | 9,790,096                         |
| <b>Mouse_Cdh3+_Cells_Rep4</b>     | 11,759,881            | 11,186,543                | 85,902                 | 191,154                        | 10,274,371                        |
| <b>Mouse_Gli1+_Cells_Rep1</b>     | 12,063,488            | 11,478,537                | 57,630                 | 178,646                        | 10,751,521                        |
| <b>Mouse_Gli1+_Cells_Rep2</b>     | 19,762,234            | 18,804,713                | 178,685                | 303,848                        | 17,446,776                        |
| <b>Mouse_Gli1+_Cells_Rep3</b>     | 19,543,117            | 18,568,695                | 122,017                | 287,214                        | 17,378,904                        |
| <b>Mouse_Lgr6+_Cells_Rep1</b>     | 20,044,455            | 19,058,807                | 121,507                | 307,804                        | 17,798,594                        |
| <b>Mouse_Lgr6+_Cells_Rep2</b>     | 19,756,354            | 18,736,071                | 197,458                | 298,652                        | 17,386,391                        |
| <b>Mouse_Lgr6+_Cells_Rep3</b>     | 19,639,299            | 18,680,969                | 217,502                | 298,146                        | 17,210,635                        |

981

982

983
